# Supplementary material for: Dysregulated Gene Expression in Lymphoblasts from Parkinson’s Disease
Source: MDPI journal article supplement (doi:10.3390/proteomes10020020), 2022-06-01
Supplement: s1 [file s1]

**Table S1: Enriched cellular components in downregulated proteins**

| GO cellular component complete                                            | Fold Enrichment | raw p-value | FDR      |
|---------------------------------------------------------------------------|-----------------|-------------|----------|
| mitochondrial proton-transporting ATP synthase, stator stalk (GO:0000274) | 85.02           | 2.67E-04    | 1.91E-02 |
| proton-transporting ATP synthase, stator stalk (GO:0045265)               | 85.02           | 2.67E-04    | 1.82E-02 |
| proton-transporting ATP synthase complex (GO:0045259)                     | 21.26           | 3.97E-04    | 2.59E-02 |
| mitochondrial proton-transporting ATP synthase complex (GO:0005753)       | 21.26           | 3.97E-04    | 2.48E-02 |
| cytosolic large ribosomal subunit (GO:0022625)                            | 14.79           | 6.33E-08    | 9.51E-06 |
| cytosolic ribosome (GO:0022626)                                           | 13.16           | 1.04E-11    | 1.56E-08 |
| cytosolic small ribosomal subunit (GO:0022627)                            | 11.19           | 8.48E-05    | 6.37E-03 |
| large ribosomal subunit (GO:0015934)                                      | 7.91            | 6.68E-06    | 7.17E-04 |
| ribosomal subunit (GO:0044391)                                            | 7.57            | 8.40E-09    | 1.80E-06 |
| ribosome (GO:0005840)                                                     | 6.92            | 6.11E-09    | 1.53E-06 |
| small ribosomal subunit (GO:0015935)                                      | 6.86            | 7.96E-04    | 3.99E-02 |
| inner mitochondrial membrane protein complex (GO:0098800)                 | 6               | 4.66E-04    | 2.80E-02 |
| focal adhesion (GO:0005925)                                               | 4.83            | 1.50E-06    | 2.04E-04 |
| cell-substrate junction (GO:0030055)                                      | 4.78            | 1.65E-06    | 2.06E-04 |
| anchoring junction (GO:0070161)                                           | 3.84            | 7.78E-06    | 7.79E-04 |
| secretory granule lumen (GO:0034774)                                      | 3.66            | 6.37E-04    | 3.54E-02 |
| cytoplasmic vesicle lumen (GO:0060205)                                    | 3.64            | 6.59E-04    | 3.54E-02 |
| vesicle lumen (GO:0031983)                                                | 3.63            | 6.82E-04    | 3.53E-02 |
| ribonucleoprotein complex (GO:1990904)                                    | 3.17            | 7.86E-06    | 7.38E-04 |
| extracellular exosome (GO:0070062)                                        | 2.68            | 1.55E-09    | 1.17E-06 |
| extracellular vesicle (GO:1903561)                                        | 2.68            | 1.64E-09    | 8.20E-07 |
| extracellular organelle (GO:0043230)                                      | 2.67            | 1.68E-09    | 6.32E-07 |
| extracellular membrane-bounded organelle (GO:0065010)                     | 2.67            | 1.68E-09    | 5.05E-07 |
| extracellular space (GO:0005615)                                          | 2.4             | 2.90E-08    | 5.44E-06 |
| cell junction (GO:0030054)                                                | 2.39            | 4.88E-04    | 2.82E-02 |
| extracellular region (GO:0005576)                                         | 2.26            | 5.46E-08    | 9.12E-06 |
| vesicle (GO:0031982)                                                      | 1.94            | 2.63E-06    | 3.04E-04 |
| intracellular non-membrane-bounded organelle (GO:0043232)                 | 1.78            | 3.83E-05    | 3.20E-03 |
| non-membrane-bounded organelle (GO:0043228)                               | 1.78            | 3.83E-05    | 3.03E-03 |
| protein-containing complex (GO:0032991)                                   | 1.68            | 8.42E-06    | 7.44E-04 |

**Table S2: Enriched cellular components in upregulated proteins**

| GO cellular component complete                                         | Fold Enrichment | raw p-value |
|------------------------------------------------------------------------|-----------------|-------------|
| retromer, cargo-selective complex (GO:0030906)                         | 8.78            | 1.68E-02    |
| cytosolic proteasome complex (GO:0031597)                              | 6.58            | 2.72E-02    |
| eukaryotic translation initiation factor 3 complex, eIF3m (GO:0071541) | 5.01            | 1.99E-02    |
| eukaryotic translation initiation factor 3 complex (GO:0005852)        | 5.01            | 9.85E-04    |
| COP9 signalosome (GO:0008180)                                          | 4.39            | 7.04E-03    |
| stereocilium bundle (GO:0032421)                                       | 4.39            | 2.74E-02    |

|                                                               |      |          |
|---------------------------------------------------------------|------|----------|
| stereocilium (GO:0032420)                                     | 4.39 | 2.74E-02 |
| eukaryotic 48S preinitiation complex (GO:0033290)             | 4.39 | 3.63E-03 |
| SCAR complex (GO:0031209)                                     | 3.9  | 3.65E-02 |
| eukaryotic 43S preinitiation complex (GO:0016282)             | 3.84 | 6.39E-03 |
| endoplasmic reticulum tubular network (GO:0071782)            | 3.66 | 2.40E-02 |
| translation preinitiation complex (GO:0070993)                | 3.61 | 8.24E-03 |
| motile cilium (GO:0031514)                                    | 2.51 | 2.60E-02 |
| proteasome complex (GO:0000502)                               | 1.99 | 3.70E-02 |
| focal adhesion (GO:0005925)                                   | 1.53 | 1.24E-02 |
| cell-substrate junction (GO:0030055)                          | 1.52 | 1.66E-02 |
| anchoring junction (GO:0070161)                               | 1.39 | 2.89E-02 |
| cytosol (GO:0005829)                                          | 1.21 | 1.26E-05 |
| nucleus (GO:0005634)                                          | 1.1  | 3.77E-02 |
| cytoplasm (GO:0005737)                                        | 1.05 | 2.04E-02 |
| intracellular anatomical structure (GO:0005622)               | 1.04 | 4.69E-04 |
| intrinsic component of membrane (GO:0031224)                  | 0.73 | 1.34E-02 |
| integral component of membrane (GO:0016021)                   | 0.73 | 1.24E-02 |
| extracellular matrix (GO:0031012)                             | 0.33 | 4.34E-02 |
| external encapsulating structure (GO:0030312)                 | 0.32 | 4.40E-02 |
| blood microparticle (GO:0072562)                              | 0.15 | 2.73E-02 |
| endoplasmic reticulum protein-containing complex (GO:0140534) | 0.14 | 1.93E-02 |

**Table S3:Enriched cellular components in downregulated transcripts**

| <b>GO cellular component complete</b>                               | <b>Fold Enrichment</b> | <b>raw p-value</b> | <b>FDR</b> |
|---------------------------------------------------------------------|------------------------|--------------------|------------|
| NSL complex (GO:0044545)                                            | 5.76                   | 2.01E-03           | 3.92E-02   |
| organellar large ribosomal subunit (GO:0000315)                     | 4.55                   | 4.44E-10           | 2.19E-08   |
| mitochondrial large ribosomal subunit (GO:0005762)                  | 4.55                   | 4.44E-10           | 2.13E-08   |
| organellar ribosome (GO:0000313)                                    | 4.41                   | 1.46E-14           | 1.31E-12   |
| mitochondrial ribosome (GO:0005761)                                 | 4.41                   | 1.46E-14           | 1.25E-12   |
| organellar small ribosomal subunit (GO:0000314)                     | 4.36                   | 1.47E-05           | 5.56E-04   |
| mitochondrial small ribosomal subunit (GO:0005763)                  | 4.36                   | 1.47E-05           | 5.45E-04   |
| preribosome, large subunit precursor (GO:0030687)                   | 4.2                    | 4.40E-05           | 1.58E-03   |
| cytosolic small ribosomal subunit (GO:0022627)                      | 4.13                   | 1.02E-07           | 4.27E-06   |
| small ribosomal subunit (GO:0015935)                                | 4.09                   | 1.76E-11           | 9.37E-10   |
| ribosomal subunit (GO:0044391)                                      | 4.03                   | 1.74E-25           | 3.42E-23   |
| large ribosomal subunit (GO:0015934)                                | 3.99                   | 9.13E-16           | 8.99E-14   |
| MLL1/2 complex (GO:0044665)                                         | 3.74                   | 6.94E-05           | 2.32E-03   |
| MLL1 complex (GO:0071339)                                           | 3.74                   | 6.94E-05           | 2.28E-03   |
| cytosolic ribosome (GO:0022626)                                     | 3.66                   | 8.40E-13           | 5.52E-11   |
| mitochondrial proton-transporting ATP synthase complex (GO:0005753) | 3.63                   | 1.08E-03           | 2.38E-02   |
| ribosome (GO:0005840)                                               | 3.61                   | 1.35E-25           | 2.96E-23   |
| cytosolic large ribosomal subunit (GO:0022625)                      | 3.58                   | 1.70E-07           | 6.96E-06   |
| proton-transporting ATP synthase complex (GO:0045259)               | 3.45                   | 1.50E-03           | 3.14E-02   |
| U12-type spliceosomal complex (GO:0005689)                          | 2.98                   | 2.42E-03           | 4.68E-02   |
| protein serine/threonine phosphatase complex (GO:0008287)           | 2.69                   | 4.61E-04           | 1.18E-02   |

|                                                                            |      |          |          |
|----------------------------------------------------------------------------|------|----------|----------|
| phosphatase complex (GO:1903293)                                           | 2.69 | 4.61E-04 | 1.17E-02 |
| organelle membrane contact site (GO:0044232)                               | 2.62 | 1.87E-03 | 3.72E-02 |
| mitochondrial protein-containing complex (GO:0098798)                      | 2.61 | 3.49E-14 | 2.87E-12 |
| ribonucleoprotein complex (GO:1990904)                                     | 2.3  | 1.11E-24 | 1.83E-22 |
| Sm-like protein family complex (GO:0120114)                                | 2.26 | 6.48E-04 | 1.48E-02 |
| preribosome (GO:0030684)                                                   | 2.24 | 5.25E-04 | 1.29E-02 |
| small nuclear ribonucleoprotein complex (GO:0030532)                       | 2.23 | 1.70E-03 | 3.46E-02 |
| protein acetyltransferase complex (GO:0031248)                             | 2.22 | 6.17E-04 | 1.48E-02 |
| acetyltransferase complex (GO:1902493)                                     | 2.22 | 6.17E-04 | 1.47E-02 |
| methyltransferase complex (GO:0034708)                                     | 2.2  | 4.04E-04 | 1.08E-02 |
| histone acetyltransferase complex (GO:0000123)                             | 2.19 | 1.61E-03 | 3.34E-02 |
| mitochondrial matrix (GO:0005759)                                          | 2.07 | 3.57E-13 | 2.70E-11 |
| U2-type spliceosomal complex (GO:0005684)                                  | 2.06 | 1.23E-03 | 2.65E-02 |
| mitochondrial inner membrane (GO:0005743)                                  | 2.01 | 3.17E-12 | 1.83E-10 |
| inner mitochondrial membrane protein complex (GO:0098800)                  | 1.96 | 2.52E-04 | 7.40E-03 |
| organelle inner membrane (GO:0019866)                                      | 1.91 | 1.64E-11 | 8.98E-10 |
| cullin-RING ubiquitin ligase complex (GO:0031461)                          | 1.86 | 2.54E-04 | 7.37E-03 |
| mitochondrial envelope (GO:0005740)                                        | 1.83 | 7.08E-14 | 5.58E-12 |
| mitochondrial membrane (GO:0031966)                                        | 1.82 | 9.29E-13 | 5.91E-11 |
| trans-Golgi network (GO:0005802)                                           | 1.71 | 1.51E-04 | 4.71E-03 |
| intracellular protein-containing complex (GO:0140535)                      | 1.7  | 4.95E-10 | 2.32E-08 |
| transferase complex (GO:1990234)                                           | 1.68 | 1.00E-09 | 4.60E-08 |
| envelope (GO:0031975)                                                      | 1.62 | 4.14E-13 | 2.92E-11 |
| organelle envelope (GO:0031967)                                            | 1.62 | 4.14E-13 | 2.81E-11 |
| ubiquitin ligase complex (GO:0000151)                                      | 1.62 | 3.29E-04 | 9.26E-03 |
| ribonucleoprotein granule (GO:0035770)                                     | 1.57 | 1.93E-03 | 3.81E-02 |
| mitochondrion (GO:0005739)                                                 | 1.57 | 5.05E-15 | 4.74E-13 |
| catalytic complex (GO:1902494)                                             | 1.57 | 1.91E-12 | 1.14E-10 |
| Golgi apparatus subcompartment (GO:0098791)                                | 1.54 | 3.31E-04 | 9.19E-03 |
| intrinsic component of organelle membrane (GO:0031300)                     | 1.52 | 3.41E-04 | 9.33E-03 |
| nuclear protein-containing complex (GO:0140513)                            | 1.47 | 6.62E-08 | 2.84E-06 |
| integral component of organelle membrane (GO:0031301)                      | 1.46 | 1.67E-03 | 3.42E-02 |
| nucleoplasm (GO:0005654)                                                   | 1.41 | 6.95E-23 | 9.78E-21 |
| nuclear lumen (GO:0031981)                                                 | 1.39 | 1.70E-23 | 2.57E-21 |
| centrosome (GO:0005813)                                                    | 1.38 | 7.84E-04 | 1.78E-02 |
| organelle lumen (GO:0043233)                                               | 1.38 | 6.79E-30 | 2.67E-27 |
| intracellular organelle lumen (GO:0070013)                                 | 1.38 | 6.79E-30 | 2.23E-27 |
| membrane-enclosed lumen (GO:0031974)                                       | 1.38 | 6.79E-30 | 1.91E-27 |
| organelle subcompartment (GO:0031984)                                      | 1.34 | 6.37E-06 | 2.51E-04 |
| nucleolus (GO:0005730)                                                     | 1.32 | 3.66E-04 | 9.89E-03 |
| protein-containing complex (GO:0032991)                                    | 1.32 | 3.00E-20 | 3.69E-18 |
| microtubule organizing center (GO:0005815)                                 | 1.31 | 1.24E-03 | 2.64E-02 |
| organelle membrane (GO:0031090)                                            | 1.3  | 1.36E-11 | 7.63E-10 |
| endoplasmic reticulum membrane (GO:0005789)                                | 1.29 | 4.36E-04 | 1.15E-02 |
| nuclear outer membrane-endoplasmic reticulum membrane network (GO:0042175) | 1.29 | 4.46E-04 | 1.16E-02 |
| endoplasmic reticulum subcompartment (GO:0098827)                          | 1.29 | 5.36E-04 | 1.30E-02 |

|                                                           |      |          |          |
|-----------------------------------------------------------|------|----------|----------|
| cytosol (GO:0005829)                                      | 1.29 | 4.61E-17 | 5.34E-15 |
| nucleus (GO:0005634)                                      | 1.27 | 4.47E-25 | 8.01E-23 |
| intracellular membrane-bounded organelle (GO:0043231)     | 1.21 | 1.04E-43 | 2.06E-40 |
| bounding membrane of organelle (GO:0098588)               | 1.2  | 6.44E-04 | 1.49E-02 |
| intracellular organelle (GO:0043229)                      | 1.17 | 2.20E-35 | 2.17E-32 |
| membrane-bounded organelle (GO:0043227)                   | 1.16 | 3.05E-33 | 2.00E-30 |
| organelle (GO:0043226)                                    | 1.13 | 6.04E-28 | 1.49E-25 |
| cytoplasm (GO:0005737)                                    | 1.13 | 5.35E-17 | 5.86E-15 |
| intracellular non-membrane-bounded organelle (GO:0043232) | 1.13 | 1.35E-04 | 4.35E-03 |
| non-membrane-bounded organelle (GO:0043228)               | 1.13 | 1.35E-04 | 4.28E-03 |
| intracellular anatomical structure (GO:0005622)           | 1.13 | 7.57E-33 | 3.73E-30 |
| extracellular space (GO:0005615)                          | 0.86 | 1.05E-03 | 2.35E-02 |
| extracellular region (GO:0005576)                         | 0.83 | 2.09E-05 | 7.63E-04 |
| integral component of membrane (GO:0016021)               | 0.79 | 2.06E-10 | 1.04E-08 |
| intrinsic component of membrane (GO:0031224)              | 0.79 | 8.02E-11 | 4.16E-09 |
| plasma membrane bounded cell projection (GO:0120025)      | 0.78 | 5.81E-05 | 2.01E-03 |
| cell projection (GO:0042995)                              | 0.77 | 1.17E-05 | 4.50E-04 |
| neuron projection (GO:0043005)                            | 0.74 | 1.64E-04 | 5.04E-03 |
| plasma membrane (GO:0005886)                              | 0.73 | 2.82E-16 | 2.92E-14 |
| cell periphery (GO:0071944)                               | 0.71 | 6.59E-21 | 8.66E-19 |
| cell surface (GO:0009986)                                 | 0.65 | 6.56E-05 | 2.23E-03 |
| plasma membrane protein complex (GO:0098797)              | 0.6  | 2.05E-04 | 6.11E-03 |
| external side of plasma membrane (GO:0009897)             | 0.59 | 1.41E-03 | 2.98E-02 |
| intrinsic component of plasma membrane (GO:0031226)       | 0.56 | 1.36E-12 | 8.35E-11 |
| integral component of plasma membrane (GO:0005887)        | 0.54 | 4.11E-13 | 3.00E-11 |
| receptor complex (GO:0043235)                             | 0.5  | 5.72E-05 | 2.01E-03 |
| ion channel complex (GO:0034702)                          | 0.45 | 3.00E-04 | 8.57E-03 |
| cation channel complex (GO:0034703)                       | 0.4  | 6.22E-04 | 1.46E-02 |
| motile cilium (GO:0031514)                                | 0.4  | 4.92E-04 | 1.23E-02 |
| extracellular matrix (GO:0031012)                         | 0.38 | 9.87E-09 | 4.32E-07 |
| external encapsulating structure (GO:0030312)             | 0.38 | 9.11E-09 | 4.08E-07 |
| collagen-containing extracellular matrix (GO:0062023)     | 0.38 | 5.51E-07 | 2.22E-05 |
| 9+2 motile cilium (GO:0097729)                            | 0.32 | 1.74E-03 | 3.50E-02 |
| 9+0 non-motile cilium (GO:0097731)                        | 0.27 | 1.09E-03 | 2.39E-02 |
| photoreceptor cell cilium (GO:0097733)                    | 0.15 | 1.70E-04 | 5.16E-03 |

**Table S4:Enriched cellular components in upregulated transcripts**

| GO cellular component complete                                | Fold Enrichment | FDR      |
|---------------------------------------------------------------|-----------------|----------|
| G protein-coupled receptor heterodimeric complex (GO:0038039) | 79.17           | 3.07E-02 |
| immunoglobulin complex (GO:0019814)                           | 5.85            | 2.44E-02 |
| plasma membrane signaling receptor complex (GO:0098802)       | 5.32            | 1.29E-02 |
| receptor complex (GO:0043235)                                 | 4.29            | 7.60E-04 |
| integral component of plasma membrane (GO:0005887)            | 2.13            | 2.52E-02 |
| intrinsic component of plasma membrane (GO:0031226)           | 2.03            | 3.19E-02 |
| plasma membrane (GO:0005886)                                  | 1.49            | 2.35E-02 |
| cell periphery (GO:0071944)                                   | 1.46            | 2.42E-02 |

|                                                       |      |          |
|-------------------------------------------------------|------|----------|
| intracellular anatomical structure (GO:0005622)       | 0.78 | 7.44E-04 |
| organelle (GO:0043226)                                | 0.74 | 2.04E-04 |
| intracellular organelle (GO:0043229)                  | 0.72 | 3.32E-04 |
| membrane-bounded organelle (GO:0043227)               | 0.66 | 2.53E-06 |
| intracellular membrane-bounded organelle (GO:0043231) | 0.62 | 4.34E-06 |
| organelle lumen (GO:0043233)                          | 0.56 | 2.37E-02 |
| intracellular organelle lumen (GO:0070013)            | 0.56 | 2.18E-02 |
| membrane-enclosed lumen (GO:0031974)                  | 0.56 | 2.03E-02 |
| nucleus (GO:0005634)                                  | 0.55 | 7.96E-04 |
| nuclear lumen (GO:0031981)                            | 0.5  | 2.36E-02 |
| nucleoplasm (GO:0005654)                              | 0.45 | 1.54E-02 |
| organelle membrane (GO:0031090)                       | 0.38 | 7.35E-03 |

**Table S5: Enriched GO biological processes in upregulated proteins**

| <b>GO biological process complete</b>                                                      | <b>Fold Change</b> | <b>p value</b> |
|--------------------------------------------------------------------------------------------|--------------------|----------------|
| axonal fasciculation (GO:0007413)                                                          | 8.78               | 2.23E-02       |
| positive regulation of toll-like receptor 9 signaling pathway (GO:0034165)                 | 8.78               | 2.23E-02       |
| regulation of toll-like receptor 9 signaling pathway (GO:0034163)                          | 8.78               | 2.23E-02       |
| hypoxanthine biosynthetic process (GO:0046101)                                             | 8.78               | 5.14E-03       |
| hypoxanthine metabolic process (GO:0046100)                                                | 8.78               | 5.14E-03       |
| regulation of nucleotide-excision repair (GO:2000819)                                      | 8.78               | 2.23E-02       |
| cardiac epithelial to mesenchymal transition (GO:0060317)                                  | 8.78               | 2.23E-02       |
| positive regulation of dopamine receptor signaling pathway (GO:0060161)                    | 8.78               | 2.23E-02       |
| regulation of dopamine receptor signaling pathway (GO:0060159)                             | 8.78               | 2.23E-02       |
| S-adenosylmethionine biosynthetic process (GO:0006556)                                     | 8.78               | 2.23E-02       |
| dsRNA transport (GO:0033227)                                                               | 8.78               | 2.23E-02       |
| regulation of ceramide biosynthetic process (GO:2000303)                                   | 8.78               | 2.23E-02       |
| positive regulation of synaptic vesicle exocytosis (GO:2000302)                            | 8.78               | 2.23E-02       |
| positive regulation of DNA demethylation (GO:1901537)                                      | 8.78               | 2.23E-02       |
| regulation of DNA demethylation (GO:1901535)                                               | 8.78               | 5.14E-03       |
| histone H4-R3 methylation (GO:0043985)                                                     | 8.78               | 2.23E-02       |
| sorbitol metabolic process (GO:0006060)                                                    | 8.78               | 2.23E-02       |
| regulation of sphingolipid biosynthetic process (GO:0090153)                               | 8.78               | 2.23E-02       |
| neuron projection fasciculation (GO:0106030)                                               | 8.78               | 2.23E-02       |
| positive regulation of neurotrophin TRK receptor signaling pathway (GO:0051388)            | 8.78               | 2.23E-02       |
| regulation of neurotrophin TRK receptor signaling pathway (GO:0051386)                     | 8.78               | 2.23E-02       |
| positive regulation of protein localization to endoplasmic reticulum (GO:1905552)          | 8.78               | 2.23E-02       |
| regulation of protein localization to endoplasmic reticulum (GO:1905550)                   | 8.78               | 2.23E-02       |
| negative regulation of translation in response to stress (GO:0032055)                      | 8.78               | 2.23E-02       |
| positive regulation of mitochondrial ATP synthesis coupled electron transport (GO:1905448) | 8.78               | 2.23E-02       |
| protein localization to nuclear inner membrane (GO:0036228)                                | 8.78               | 2.23E-02       |
| negative regulation of granulocyte differentiation (GO:0030853)                            | 8.78               | 2.23E-02       |
| histone H2B conserved C-terminal lysine deubiquitination (GO:0035616)                      | 8.78               | 2.23E-02       |
| positive regulation of metallopeptidase activity (GO:1905050)                              | 8.78               | 2.23E-02       |

|                                                                                       |      |          |
|---------------------------------------------------------------------------------------|------|----------|
| regulation of membrane lipid metabolic process (GO:1905038)                           | 8.78 | 2.23E-02 |
| hypoxanthine salvage (GO:0043103)                                                     | 8.78 | 2.23E-02 |
| histone arginine methylation (GO:0034969)                                             | 8.78 | 5.14E-03 |
| negative regulation of IRE1-mediated unfolded protein response (GO:1903895)           | 8.78 | 2.23E-02 |
| peptidyl-arginine omega-N-methylation (GO:0035247)                                    | 8.78 | 5.14E-03 |
| peptidyl-arginine methylation, to asymmetrical-dimethyl arginine (GO:0019919)         | 8.78 | 2.23E-02 |
| regulation of membrane tubulation (GO:1903525)                                        | 8.78 | 2.23E-02 |
| fructose biosynthetic process (GO:0046370)                                            | 8.78 | 2.23E-02 |
| L-kynurenine catabolic process (GO:0097053)                                           | 8.78 | 2.23E-02 |
| T-helper 17 cell lineage commitment (GO:0072540)                                      | 8.78 | 2.23E-02 |
| T-helper 17 cell differentiation (GO:0072539)                                         | 8.78 | 2.23E-02 |
| formaldehyde catabolic process (GO:0046294)                                           | 8.78 | 2.23E-02 |
| formaldehyde metabolic process (GO:0046292)                                           | 8.78 | 2.23E-02 |
| protein ufmylation (GO:0071569)                                                       | 7.31 | 6.96E-04 |
| protein K69-linked ufmylation (GO:1990592)                                            | 7.02 | 2.77E-03 |
| protein polyufmylation (GO:1990564)                                                   | 7.02 | 2.77E-03 |
| positive regulation of gamma-delta T cell differentiation (GO:0045588)                | 6.58 | 1.12E-02 |
| regulation of gamma-delta T cell differentiation (GO:0045586)                         | 6.58 | 1.12E-02 |
| T-helper cell lineage commitment (GO:0002295)                                         | 6.58 | 1.12E-02 |
| peptidyl-arginine methylation (GO:0018216)                                            | 6.58 | 1.12E-02 |
| CD4-positive, alpha-beta T cell lineage commitment (GO:0043373)                       | 6.58 | 1.12E-02 |
| CD4-positive or CD8-positive, alpha-beta T cell lineage commitment (GO:0043369)       | 6.58 | 1.12E-02 |
| peptidyl-arginine N-methylation (GO:0035246)                                          | 6.58 | 1.12E-02 |
| positive regulation of gamma-delta T cell activation (GO:0046645)                     | 6.58 | 1.12E-02 |
| regulation of gamma-delta T cell activation (GO:0046643)                              | 6.58 | 1.12E-02 |
| protein hexamerization (GO:0034214)                                                   | 5.85 | 4.66E-02 |
| adenine biosynthetic process (GO:0046084)                                             | 5.85 | 4.66E-02 |
| adenine metabolic process (GO:0046083)                                                | 5.85 | 4.66E-02 |
| negative regulation of T cell mediated cytotoxicity (GO:0001915)                      | 5.85 | 4.66E-02 |
| positive regulation of neutrophil activation (GO:1902565)                             | 5.85 | 4.66E-02 |
| definitive hemopoiesis (GO:0060216)                                                   | 5.85 | 4.66E-02 |
| common-partner SMAD protein phosphorylation (GO:0007182)                              | 5.85 | 4.66E-02 |
| regulation of glycogen catabolic process (GO:0005981)                                 | 5.85 | 4.66E-02 |
| positive regulation of intracellular estrogen receptor signaling pathway (GO:0033148) | 5.85 | 4.66E-02 |
| 7-methylguanosine mRNA capping (GO:0006370)                                           | 5.85 | 4.66E-02 |
| peptidyl-glutamic acid modification (GO:0018200)                                      | 5.85 | 4.66E-02 |
| negative regulation of dendrite development (GO:2000171)                              | 5.85 | 4.66E-02 |
| histone H3 acetylation (GO:0043966)                                                   | 5.85 | 4.66E-02 |
| proteasome regulatory particle assembly (GO:0070682)                                  | 5.85 | 4.66E-02 |
| hexitol metabolic process (GO:0006059)                                                | 5.85 | 4.66E-02 |
| negative regulation of membrane permeability (GO:1905709)                             | 5.85 | 4.66E-02 |
| AMP salvage (GO:0044209)                                                              | 5.85 | 4.66E-02 |
| cellular response to leucine starvation (GO:1990253)                                  | 5.85 | 4.66E-02 |
| regulation of mitochondrial ATP synthesis coupled electron transport (GO:1905446)     | 5.85 | 4.66E-02 |

|                                                                                                      |      |          |
|------------------------------------------------------------------------------------------------------|------|----------|
| positive regulation of potassium ion transmembrane transporter activity (GO:1901018)                 | 5.85 | 4.66E-02 |
| positive regulation of isotype switching to IgG isotypes (GO:0048304)                                | 5.85 | 4.66E-02 |
| regulation of isotype switching to IgG isotypes (GO:0048302)                                         | 5.85 | 4.66E-02 |
| kynurenine metabolic process (GO:0070189)                                                            | 5.85 | 4.66E-02 |
| RNA capping (GO:0036260)                                                                             | 5.85 | 4.66E-02 |
| negative regulation of mitochondrial membrane permeability (GO:0035795)                              | 5.85 | 4.66E-02 |
| 7-methylguanosine RNA capping (GO:0009452)                                                           | 5.85 | 4.66E-02 |
| regulation of myofibroblast differentiation (GO:1904760)                                             | 5.85 | 4.66E-02 |
| monoubiquitinated protein deubiquitination (GO:0035520)                                              | 5.85 | 4.66E-02 |
| fatty acid homeostasis (GO:0055089)                                                                  | 5.85 | 4.66E-02 |
| motor behavior (GO:0061744)                                                                          | 5.85 | 4.66E-02 |
| purine nucleobase salvage (GO:0043096)                                                               | 5.85 | 4.66E-02 |
| histone-serine phosphorylation (GO:0035404)                                                          | 5.85 | 4.66E-02 |
| purine nucleoside triphosphate catabolic process (GO:0009146)                                        | 5.85 | 4.66E-02 |
| dendrite extension (GO:0097484)                                                                      | 5.85 | 4.66E-02 |
| maintenance of protein location in mitochondrion (GO:0072656)                                        | 5.85 | 4.66E-02 |
| regulation of glial cell apoptotic process (GO:0034350)                                              | 5.85 | 4.66E-02 |
| glial cell apoptotic process (GO:0034349)                                                            | 5.85 | 4.66E-02 |
| L-kynurenine metabolic process (GO:0097052)                                                          | 5.85 | 4.66E-02 |
| cerebral cortex neuron differentiation (GO:0021895)                                                  | 5.85 | 4.66E-02 |
| regulation of vacuolar transport (GO:1903335)                                                        | 5.85 | 4.66E-02 |
| T-helper 17 type immune response (GO:0072538)                                                        | 5.85 | 4.66E-02 |
| regulation of late endosome to lysosome transport (GO:1902822)                                       | 5.85 | 4.66E-02 |
| alpha-beta T cell lineage commitment (GO:0002363)                                                    | 5.27 | 2.01E-02 |
| glycogen catabolic process (GO:0005980)                                                              | 5.27 | 2.01E-02 |
| viral translational termination-reinitiation (GO:0075525)                                            | 5.27 | 2.01E-02 |
| negative regulation of protein kinase activity by regulation of protein phosphorylation (GO:0044387) | 5.27 | 2.01E-02 |
| regulation of stem cell population maintenance (GO:2000036)                                          | 5.27 | 2.01E-02 |
| Golgi disassembly (GO:0090166)                                                                       | 5.27 | 2.01E-02 |
| cellular polysaccharide catabolic process (GO:0044247)                                               | 5.27 | 2.01E-02 |
| regulation of endodeoxyribonuclease activity (GO:0032071)                                            | 5.27 | 2.01E-02 |
| protein deneddylation (GO:0000338)                                                                   | 5.27 | 1.13E-03 |
| nuclear membrane disassembly (GO:0051081)                                                            | 5.27 | 2.01E-02 |
| polysaccharide catabolic process (GO:0000272)                                                        | 5.27 | 2.01E-02 |
| SCF-dependent proteasomal ubiquitin-dependent protein catabolic process (GO:0031146)                 | 5.27 | 2.01E-02 |
| glucan catabolic process (GO:0009251)                                                                | 5.27 | 2.01E-02 |
| deoxyribonucleoside triphosphate catabolic process (GO:0009204)                                      | 5.27 | 2.01E-02 |
| nucleoside triphosphate catabolic process (GO:0009143)                                               | 5.27 | 2.01E-02 |
| membrane disassembly (GO:0030397)                                                                    | 5.27 | 2.01E-02 |
| cerebral cortex radially oriented cell migration (GO:0021799)                                        | 5.01 | 8.92E-03 |
| telencephalon glial cell migration (GO:0022030)                                                      | 5.01 | 8.92E-03 |
| CD4-positive, alpha-beta T cell differentiation involved in immune response (GO:0002294)             | 5.01 | 8.92E-03 |
| alpha-beta T cell differentiation involved in immune response (GO:0002293)                           | 5.01 | 8.92E-03 |
| alpha-beta T cell activation involved in immune response (GO:0002287)                                | 5.01 | 8.92E-03 |

|                                                                                      |      |          |
|--------------------------------------------------------------------------------------|------|----------|
| CD4-positive, alpha-beta T cell differentiation (GO:0043367)                         | 5.01 | 8.92E-03 |
| reticulophagy (GO:0061709)                                                           | 5.01 | 8.92E-03 |
| T-helper cell differentiation (GO:0042093)                                           | 5.01 | 8.92E-03 |
| cerebral cortex radial glia-guided migration (GO:0021801)                            | 5.01 | 8.92E-03 |
| formation of cytoplasmic translation initiation complex (GO:0001732)                 | 4.68 | 3.86E-04 |
| cerebral cortex cell migration (GO:0021795)                                          | 4.39 | 1.39E-02 |
| positive regulation of neutrophil migration (GO:1902624)                             | 4.39 | 1.39E-02 |
| positive regulation of B cell differentiation (GO:0045579)                           | 4.39 | 3.21E-02 |
| T cell lineage commitment (GO:0002360)                                               | 4.39 | 3.21E-02 |
| negative regulation of posttranscriptional gene silencing (GO:0060149)               | 4.39 | 3.21E-02 |
| positive regulation of mRNA binding (GO:1902416)                                     | 4.39 | 3.21E-02 |
| regulation of mRNA binding (GO:1902415)                                              | 4.39 | 1.39E-02 |
| T cell differentiation involved in immune response (GO:0002292)                      | 4.39 | 1.39E-02 |
| receptor catabolic process (GO:0032801)                                              | 4.39 | 3.21E-02 |
| peptidyl-arginine modification (GO:0018195)                                          | 4.39 | 3.21E-02 |
| protein K48-linked deubiquitination (GO:0071108)                                     | 4.39 | 3.21E-02 |
| purine nucleotide salvage (GO:0032261)                                               | 4.39 | 3.21E-02 |
| photoperiodism (GO:0009648)                                                          | 4.39 | 3.21E-02 |
| entrainment of circadian clock by photoperiod (GO:0043153)                           | 4.39 | 3.21E-02 |
| regulation of IRE1-mediated unfolded protein response (GO:1903894)                   | 4.39 | 3.21E-02 |
| negative regulation of gene silencing by RNA (GO:0060967)                            | 4.39 | 3.21E-02 |
| determination of adult lifespan (GO:0008340)                                         | 4.39 | 3.21E-02 |
| microtubule anchoring (GO:0034453)                                                   | 4.39 | 3.21E-02 |
| cellular carbohydrate catabolic process (GO:0044275)                                 | 4.05 | 4.12E-03 |
| nuclear migration (GO:0007097)                                                       | 3.99 | 9.11E-03 |
| positive T cell selection (GO:0043368)                                               | 3.99 | 9.11E-03 |
| multicellular organism aging (GO:0010259)                                            | 3.9  | 2.04E-02 |
| positive regulation of cell cycle G2/M phase transition (GO:1902751)                 | 3.9  | 2.04E-02 |
| telencephalon cell migration (GO:0022029)                                            | 3.9  | 2.04E-02 |
| B cell homeostasis (GO:0001782)                                                      | 3.9  | 2.04E-02 |
| positive regulation of organ growth (GO:0046622)                                     | 3.9  | 2.04E-02 |
| forebrain cell migration (GO:0021885)                                                | 3.9  | 2.04E-02 |
| positive regulation of heart growth (GO:0060421)                                     | 3.76 | 4.69E-02 |
| cellular response to aldehyde (GO:0110096)                                           | 3.76 | 4.69E-02 |
| regulation of neutrophil activation (GO:1902563)                                     | 3.76 | 4.69E-02 |
| endoplasmic reticulum tubular network organization (GO:0071786)                      | 3.76 | 4.69E-02 |
| cellular response to BMP stimulus (GO:0071773)                                       | 3.76 | 4.69E-02 |
| response to BMP (GO:0071772)                                                         | 3.76 | 4.69E-02 |
| positive regulation of granulocyte chemotaxis (GO:0071624)                           | 3.76 | 4.69E-02 |
| myeloid dendritic cell activation (GO:0001773)                                       | 3.76 | 4.69E-02 |
| regulation of production of small RNA involved in gene silencing by RNA (GO:0070920) | 3.76 | 4.69E-02 |
| positive regulation of neutrophil chemotaxis (GO:0090023)                            | 3.76 | 4.69E-02 |
| mitochondrial fragmentation involved in apoptotic process (GO:0043653)               | 3.76 | 4.69E-02 |
| regulation of deoxyribonuclease activity (GO:0032070)                                | 3.76 | 4.69E-02 |
| entrainment of circadian clock (GO:0009649)                                          | 3.76 | 4.69E-02 |
| Golgi inheritance (GO:0048313)                                                       | 3.76 | 4.69E-02 |
| organelle inheritance (GO:0048308)                                                   | 3.76 | 4.69E-02 |
| negative regulation of plasma membrane bounded cell projection assembly (GO:0120033) | 3.76 | 4.69E-02 |



|                                                                                                          |      |          |
|----------------------------------------------------------------------------------------------------------|------|----------|
| positive regulation of RNA binding (GO:1905216)                                                          | 3.76 | 4.69E-02 |
| neuron cellular homeostasis (GO:0070050)                                                                 | 3.76 | 4.69E-02 |
| histone phosphorylation (GO:0016572)                                                                     | 3.76 | 5.85E-03 |
| protein localization to endosome (GO:0036010)                                                            | 3.76 | 4.69E-02 |
| regulation of microtubule nucleation (GO:0010968)                                                        | 3.76 | 4.69E-02 |
| BMP signaling pathway (GO:0030509)                                                                       | 3.76 | 4.69E-02 |
| positive regulation of TORC1 signaling (GO:1904263)                                                      | 3.76 | 4.69E-02 |
| regulation of production of miRNAs involved in gene silencing by miRNA (GO:1903798)                      | 3.76 | 4.69E-02 |
| regulation of plasma membrane organization (GO:1903729)                                                  | 3.76 | 4.69E-02 |
| positive regulation of lamellipodium assembly (GO:0010592)                                               | 3.76 | 5.85E-03 |
| retrograde axonal transport (GO:0008090)                                                                 | 3.76 | 4.69E-02 |
| neuron recognition (GO:0008038)                                                                          | 3.76 | 4.69E-02 |
| positive regulation of interleukin-10 production (GO:0032733)                                            | 3.66 | 1.29E-02 |
| nucleus localization (GO:0051647)                                                                        | 3.66 | 1.29E-02 |
| alpha-beta T cell differentiation (GO:0046632)                                                           | 3.66 | 1.29E-02 |
| regulation of intracellular estrogen receptor signaling pathway (GO:0033146)                             | 3.61 | 3.73E-03 |
| cytoplasmic translational initiation (GO:0002183)                                                        | 3.58 | 3.37E-04 |
| T cell selection (GO:0045058)                                                                            | 3.51 | 8.06E-03 |
| mitochondrial electron transport, cytochrome c to oxygen (GO:0006123)                                    | 3.51 | 2.86E-02 |
| CD4-positive, alpha-beta T cell activation (GO:0035710)                                                  | 3.51 | 2.86E-02 |
| regulation of RNA binding (GO:1905214)                                                                   | 3.51 | 2.86E-02 |
| deoxyribonucleoside triphosphate metabolic process (GO:0009200)                                          | 3.51 | 2.86E-02 |
| purine nucleobase biosynthetic process (GO:0009113)                                                      | 3.51 | 2.86E-02 |
| carbohydrate phosphorylation (GO:0046835)                                                                | 3.51 | 2.86E-02 |
| maintenance of cell polarity (GO:0030011)                                                                | 3.51 | 2.86E-02 |
| positive regulation of pattern recognition receptor signaling pathway (GO:0062208)                       | 3.38 | 1.75E-02 |
| regulation of protein deacetylation (GO:0090311)                                                         | 3.19 | 3.84E-02 |
| positive regulation of B cell proliferation (GO:0030890)                                                 | 3.13 | 2.32E-02 |
| positive regulation of axon extension (GO:0045773)                                                       | 3.1  | 1.42E-02 |
| negative regulation of proteasomal ubiquitin-dependent protein catabolic process (GO:0032435)            | 3.1  | 1.42E-02 |
| nuclear pore organization (GO:0006999)                                                                   | 2.93 | 4.98E-02 |
| regulation of heart growth (GO:0060420)                                                                  | 2.93 | 4.98E-02 |
| nucleobase biosynthetic process (GO:0046112)                                                             | 2.93 | 2.99E-02 |
| positive regulation of erythrocyte differentiation (GO:0045648)                                          | 2.93 | 4.98E-02 |
| immune response-regulating cell surface receptor signaling pathway involved in phagocytosis (GO:0002433) | 2.93 | 4.98E-02 |
| positive regulation of superoxide anion generation (GO:0032930)                                          | 2.93 | 4.98E-02 |
| regulation of superoxide anion generation (GO:0032928)                                                   | 2.93 | 4.98E-02 |
| Fc-gamma receptor signaling pathway involved in phagocytosis (GO:0038096)                                | 2.93 | 4.98E-02 |
| negative regulation of reproductive process (GO:2000242)                                                 | 2.93 | 4.98E-02 |
| establishment of epithelial cell polarity (GO:0090162)                                                   | 2.93 | 4.98E-02 |
| establishment of spindle orientation (GO:0051294)                                                        | 2.93 | 4.98E-02 |
| positive regulation of axonogenesis (GO:0050772)                                                         | 2.93 | 1.12E-02 |
| positive regulation of TOR signaling (GO:0032008)                                                        | 2.93 | 2.99E-02 |
| membrane raft organization (GO:0031579)                                                                  | 2.93 | 4.98E-02 |

|                                                                            |      |          |
|----------------------------------------------------------------------------|------|----------|
| Rac protein signal transduction (GO:0016601)                               | 2.93 | 4.98E-02 |
| regulation of CD4-positive, alpha-beta T cell differentiation (GO:0043370) | 2.93 | 4.98E-02 |
| regulation of circadian rhythm (GO:0042752)                                | 2.93 | 2.69E-03 |
| peptide catabolic process (GO:0043171)                                     | 2.93 | 4.98E-02 |
| vesicle transport along microtubule (GO:0047496)                           | 2.93 | 2.99E-02 |
| regulation of ruffle assembly (GO:1900027)                                 | 2.93 | 4.98E-02 |
| T cell proliferation (GO:0042098)                                          | 2.93 | 4.98E-02 |
| cell aging (GO:0007569)                                                    | 2.93 | 6.93E-03 |
| alpha-beta T cell activation (GO:0046631)                                  | 2.93 | 1.82E-02 |
| regulation of lamellipodium assembly (GO:0010591)                          | 2.93 | 1.82E-02 |
| regulation of axonogenesis (GO:0050770)                                    | 2.83 | 3.38E-03 |
| peptidyl-threonine phosphorylation (GO:0018107)                            | 2.82 | 5.42E-03 |
| apoptotic mitochondrial changes (GO:0008637)                               | 2.81 | 8.72E-03 |
| transforming growth factor beta receptor signaling pathway (GO:0007179)    | 2.77 | 2.30E-02 |
| regulation of alpha-beta T cell differentiation (GO:0046637)               | 2.77 | 2.30E-02 |
| response to amino acid starvation (GO:1990928)                             | 2.74 | 3.78E-02 |
| regulation of interleukin-10 production (GO:0032653)                       | 2.74 | 3.78E-02 |
| base-excision repair (GO:0006284)                                          | 2.74 | 3.78E-02 |
| maintenance of protein localization in organelle (GO:0072595)              | 2.74 | 3.78E-02 |
| positive regulation of regulated secretory pathway (GO:1903307)            | 2.74 | 3.78E-02 |
| peptidyl-threonine modification (GO:0018210)                               | 2.72 | 6.74E-03 |
| regulation of B cell proliferation (GO:0030888)                            | 2.7  | 1.08E-02 |
| limbic system development (GO:0021761)                                     | 2.67 | 1.75E-02 |
| hippocampus development (GO:0021766)                                       | 2.63 | 2.85E-02 |
| positive regulation of lamellipodium organization (GO:1902745)             | 2.63 | 2.85E-02 |
| regulation of posttranscriptional gene silencing (GO:0060147)              | 2.63 | 2.85E-02 |
| cell fate commitment (GO:0045165)                                          | 2.63 | 2.85E-02 |
| response to dsRNA (GO:0043331)                                             | 2.63 | 2.85E-02 |
| regulation of axon extension (GO:0030516)                                  | 2.63 | 8.30E-03 |
| regulation of gene silencing by RNA (GO:0060966)                           | 2.63 | 2.85E-02 |
| translational initiation (GO:0006413)                                      | 2.6  | 5.95E-04 |
| protein modification by small protein removal (GO:0070646)                 | 2.59 | 1.93E-03 |
| nuclear membrane organization (GO:0071763)                                 | 2.58 | 4.68E-02 |
| positive regulation of interleukin-2 production (GO:0032743)               | 2.58 | 4.68E-02 |
| glycogen metabolic process (GO:0005977)                                    | 2.58 | 4.68E-02 |
| cellular glucan metabolic process (GO:0006073)                             | 2.58 | 4.68E-02 |
| establishment of spindle localization (GO:0051293)                         | 2.58 | 4.68E-02 |
| glucan metabolic process (GO:0044042)                                      | 2.58 | 4.68E-02 |
| positive regulation of actin filament polymerization (GO:0030838)          | 2.58 | 6.34E-03 |
| regulation of organ growth (GO:0046620)                                    | 2.58 | 4.68E-02 |
| nuclear envelope organization (GO:0006998)                                 | 2.56 | 2.15E-02 |
| cell cycle G1/S phase transition (GO:0044843)                              | 2.56 | 2.15E-02 |
| histone methylation (GO:0016571)                                           | 2.56 | 2.15E-02 |
| G1/S transition of mitotic cell cycle (GO:0000082)                         | 2.56 | 2.15E-02 |
| nucleus organization (GO:0006997)                                          | 2.51 | 8.69E-04 |
| negative regulation of proteasomal protein catabolic process (GO:1901799)  | 2.51 | 3.48E-02 |
| regulation of TOR signaling (GO:0032006)                                   | 2.51 | 3.48E-02 |
| regulation of mitochondrial membrane permeability (GO:0046902)             | 2.51 | 3.48E-02 |
| establishment of cell polarity (GO:0030010)                                | 2.48 | 5.83E-03 |

|                                                                                       |      |          |
|---------------------------------------------------------------------------------------|------|----------|
| regulation of extent of cell growth (GO:0061387)                                      | 2.47 | 1.22E-02 |
| regulation of membrane permeability (GO:0090559)                                      | 2.46 | 2.60E-02 |
| negative regulation of ubiquitin-dependent protein catabolic process (GO:2000059)     | 2.46 | 2.60E-02 |
| positive regulation of protein polymerization (GO:0032273)                            | 2.46 | 2.14E-03 |
| regulation of intracellular steroid hormone receptor signaling pathway (GO:0033143)   | 2.42 | 1.95E-02 |
| organelle disassembly (GO:1903008)                                                    | 2.39 | 1.46E-02 |
| COPII-coated vesicle budding (GO:0090114)                                             | 2.39 | 4.20E-02 |
| positive regulation of plasma membrane bounded cell projection assembly (GO:0120034)  | 2.36 | 3.12E-02 |
| erythrocyte differentiation (GO:0030218)                                              | 2.34 | 2.32E-02 |
| protein methylation (GO:0006479)                                                      | 2.32 | 1.74E-02 |
| protein alkylation (GO:0008213)                                                       | 2.32 | 1.74E-02 |
| peptidyl-serine modification (GO:0018209)                                             | 2.31 | 2.71E-03 |
| regulation of cell size (GO:0008361)                                                  | 2.28 | 4.21E-03 |
| regulation of protein targeting (GO:1903533)                                          | 2.26 | 2.75E-02 |
| negative regulation of cellular protein catabolic process (GO:1903363)                | 2.26 | 2.75E-02 |
| peptidyl-serine phosphorylation (GO:0018105)                                          | 2.24 | 6.52E-03 |
| lymphocyte activation involved in immune response (GO:0002285)                        | 2.19 | 3.22E-02 |
| regulation of alpha-beta T cell activation (GO:0046634)                               | 2.19 | 3.22E-02 |
| positive regulation of developmental growth (GO:0048639)                              | 2.19 | 1.79E-02 |
| lymphocyte proliferation (GO:0046651)                                                 | 2.19 | 4.34E-02 |
| establishment or maintenance of cell polarity (GO:0007163)                            | 2.16 | 2.86E-03 |
| cell cycle phase transition (GO:0044770)                                              | 2.15 | 1.56E-02 |
| protein autophosphorylation (GO:0046777)                                              | 2.15 | 1.56E-02 |
| negative regulation of cell projection organization (GO:0031345)                      | 2.14 | 2.08E-02 |
| positive regulation of cytoskeleton organization (GO:0051495)                         | 2.13 | 2.50E-03 |
| positive regulation of angiogenesis (GO:0045766)                                      | 2.13 | 3.75E-02 |
| transmembrane receptor protein serine/threonine kinase signaling pathway (GO:0007178) | 2.13 | 3.75E-02 |
| positive regulation of vasculature development (GO:1904018)                           | 2.13 | 3.75E-02 |
| mitotic cell cycle phase transition (GO:0044772)                                      | 2.09 | 2.40E-02 |
| leukocyte chemotaxis (GO:0030595)                                                     | 2.08 | 3.22E-02 |
| cell activation involved in immune response (GO:0002263)                              | 2.07 | 1.17E-02 |
| DNA recombination (GO:0006310)                                                        | 2.07 | 1.17E-02 |
| protein deubiquitination (GO:0016579)                                                 | 2.06 | 4.33E-02 |
| cellular carbohydrate metabolic process (GO:0044262)                                  | 2.06 | 1.55E-02 |
| macromolecule methylation (GO:0043414)                                                | 2.06 | 7.60E-03 |
| response to UV (GO:0009411)                                                           | 2.05 | 2.07E-02 |
| leukocyte activation involved in immune response (GO:0002366)                         | 2.03 | 1.77E-02 |
| telencephalon development (GO:0021537)                                                | 2.01 | 2.36E-02 |
| erythrocyte homeostasis (GO:0034101)                                                  | 2.01 | 4.96E-02 |
| myeloid cell homeostasis (GO:0002262)                                                 | 1.97 | 4.21E-02 |
| neuron projection development (GO:0031175)                                            | 1.96 | 5.63E-04 |
| antigen processing and presentation (GO:0019882)                                      | 1.93 | 3.04E-02 |
| plasma membrane bounded cell projection morphogenesis (GO:0120039)                    | 1.93 | 7.01E-03 |
| neuron projection morphogenesis (GO:0048812)                                          | 1.91 | 9.22E-03 |
| cell projection morphogenesis (GO:0048858)                                            | 1.9  | 7.88E-03 |
| histone modification (GO:0016570)                                                     | 1.89 | 6.74E-03 |

|                                                                             |      |          |
|-----------------------------------------------------------------------------|------|----------|
| regulation of plasma membrane bounded cell projection assembly (GO:0120032) | 1.89 | 3.43E-02 |
| protein import into nucleus (GO:0006606)                                    | 1.87 | 4.56E-02 |
| regulation of cell projection assembly (GO:0060491)                         | 1.86 | 3.85E-02 |
| DNA packaging (GO:0006323)                                                  | 1.86 | 3.85E-02 |
| response to light stimulus (GO:0009416)                                     | 1.85 | 1.79E-02 |
| regulation of protein polymerization (GO:0032271)                           | 1.84 | 6.13E-03 |
| regulation of cellular component size (GO:0032535)                          | 1.83 | 1.81E-03 |
| neuron differentiation (GO:0030182)                                         | 1.83 | 5.34E-04 |
| homeostasis of number of cells (GO:0048872)                                 | 1.83 | 1.99E-02 |
| cellular component morphogenesis (GO:0032989)                               | 1.82 | 5.81E-03 |
| covalent chromatin modification (GO:0016569)                                | 1.81 | 1.04E-02 |
| protein import (GO:0017038)                                                 | 1.81 | 3.08E-02 |
| rhythmic process (GO:0048511)                                               | 1.81 | 2.61E-02 |
| forebrain development (GO:0030900)                                          | 1.81 | 2.61E-02 |
| positive regulation of supramolecular fiber organization (GO:1902905)       | 1.8  | 2.22E-02 |
| cell morphogenesis involved in neuron differentiation (GO:0048667)          | 1.78 | 3.43E-02 |
| regulation of actin filament polymerization (GO:0030833)                    | 1.78 | 2.46E-02 |
| cell part morphogenesis (GO:0032990)                                        | 1.77 | 1.28E-02 |
| regulation of microtubule-based process (GO:0032886)                        | 1.76 | 3.80E-02 |
| establishment of vesicle localization (GO:0051650)                          | 1.76 | 3.80E-02 |
| aging (GO:0007568)                                                          | 1.76 | 1.42E-02 |
| methylation (GO:0032259)                                                    | 1.76 | 2.72E-02 |
| positive regulation of protein-containing complex assembly (GO:0031334)     | 1.76 | 1.67E-02 |
| regulation of actin filament length (GO:0030832)                            | 1.73 | 2.55E-02 |
| regulation of actin polymerization or depolymerization (GO:0008064)         | 1.73 | 2.55E-02 |
| regulation of developmental growth (GO:0048638)                             | 1.73 | 3.55E-02 |
| axon development (GO:0061564)                                               | 1.73 | 4.98E-02 |
| cellular component disassembly (GO:0022411)                                 | 1.72 | 1.06E-02 |
| neuron development (GO:0048666)                                             | 1.72 | 3.76E-03 |
| chemotaxis (GO:0006935)                                                     | 1.71 | 2.38E-02 |
| taxis (GO:0042330)                                                          | 1.71 | 2.38E-02 |
| positive regulation of protein kinase activity (GO:0045860)                 | 1.7  | 2.61E-02 |
| regulation of response to DNA damage stimulus (GO:2001020)                  | 1.68 | 4.30E-02 |
| DNA conformation change (GO:0071103)                                        | 1.68 | 2.87E-02 |
| positive regulation of secretion by cell (GO:1903532)                       | 1.67 | 3.38E-02 |
| small GTPase mediated signal transduction (GO:0007264)                      | 1.66 | 3.13E-02 |
| peptidyl-amino acid modification (GO:0018193)                               | 1.65 | 2.30E-03 |
| regulation of actin filament organization (GO:0110053)                      | 1.63 | 2.49E-02 |
| protein modification by small protein conjugation or removal (GO:0070647)   | 1.62 | 5.54E-03 |
| regulation of anatomical structure size (GO:0090066)                        | 1.62 | 9.64E-03 |
| positive regulation of kinase activity (GO:0033674)                         | 1.61 | 2.70E-02 |
| mitotic cell cycle process (GO:1903047)                                     | 1.6  | 8.93E-03 |
| cell population proliferation (GO:0008283)                                  | 1.59 | 2.71E-02 |
| cell morphogenesis involved in differentiation (GO:0000904)                 | 1.59 | 4.40E-02 |
| plasma membrane bounded cell projection organization (GO:0120036)           | 1.58 | 5.55E-03 |
| regulation of actin cytoskeleton organization (GO:0032956)                  | 1.58 | 2.31E-02 |
| negative regulation of organelle organization (GO:0010639)                  | 1.58 | 2.93E-02 |
| generation of neurons (GO:0048699)                                          | 1.57 | 3.44E-03 |

|                                                                     |      |          |
|---------------------------------------------------------------------|------|----------|
| regulation of protein-containing complex assembly (GO:0043254)      | 1.57 | 1.22E-02 |
| cell projection organization (GO:0030030)                           | 1.56 | 5.96E-03 |
| ribonucleoprotein complex assembly (GO:0022618)                     | 1.56 | 2.92E-02 |
| positive regulation of cellular protein localization (GO:1903829)   | 1.54 | 4.00E-02 |
| protein phosphorylation (GO:0006468)                                | 1.52 | 2.42E-02 |
| ribonucleoprotein complex subunit organization (GO:0071826)         | 1.52 | 3.64E-02 |
| chromatin organization (GO:0006325)                                 | 1.52 | 1.37E-02 |
| regulation of cytoskeleton organization (GO:0051493)                | 1.52 | 1.37E-02 |
| positive regulation of cellular component biogenesis (GO:0044089)   | 1.52 | 2.05E-02 |
| cell migration (GO:0016477)                                         | 1.51 | 1.47E-02 |
| localization of cell (GO:0051674)                                   | 1.51 | 1.14E-02 |
| cell motility (GO:0048870)                                          | 1.51 | 1.14E-02 |
| positive regulation of protein transport (GO:0051222)               | 1.5  | 4.97E-02 |
| cell morphogenesis (GO:0000902)                                     | 1.5  | 3.85E-02 |
| locomotion (GO:0040011)                                             | 1.48 | 1.07E-02 |
| regulation of actin filament-based process (GO:0032970)             | 1.47 | 4.40E-02 |
| mitotic cell cycle (GO:0000278)                                     | 1.46 | 1.85E-02 |
| chromosome organization (GO:0051276)                                | 1.46 | 5.05E-03 |
| neurogenesis (GO:0022008)                                           | 1.46 | 9.18E-03 |
| cell cycle process (GO:0022402)                                     | 1.46 | 1.53E-02 |
| positive regulation of cell differentiation (GO:0045597)            | 1.45 | 3.00E-02 |
| cell division (GO:0051301)                                          | 1.45 | 3.48E-02 |
| regulation of protein kinase activity (GO:0045859)                  | 1.44 | 4.50E-02 |
| membrane organization (GO:0061024)                                  | 1.44 | 9.89E-03 |
| positive regulation of protein phosphorylation (GO:0001934)         | 1.43 | 4.67E-02 |
| positive regulation of phosphorylation (GO:0042327)                 | 1.42 | 3.84E-02 |
| proteolysis (GO:0006508)                                            | 1.4  | 8.65E-03 |
| regulation of cellular amide metabolic process (GO:0034248)         | 1.4  | 3.17E-02 |
| positive regulation of developmental process (GO:0051094)           | 1.39 | 1.96E-02 |
| negative regulation of cellular component organization (GO:0051129) | 1.38 | 3.44E-02 |
| cell cycle (GO:0007049)                                             | 1.38 | 9.31E-03 |
| regulation of cell cycle (GO:0051726)                               | 1.38 | 2.52E-02 |
| apoptotic process (GO:0006915)                                      | 1.38 | 2.00E-02 |
| positive regulation of organelle organization (GO:0010638)          | 1.37 | 3.95E-02 |
| cell death (GO:0008219)                                             | 1.37 | 1.83E-02 |
| positive regulation of phosphorus metabolic process (GO:0010562)    | 1.37 | 4.67E-02 |
| positive regulation of phosphate metabolic process (GO:0045937)     | 1.37 | 4.67E-02 |
| cellular protein modification process (GO:0006464)                  | 1.37 | 1.40E-03 |
| protein modification process (GO:0036211)                           | 1.37 | 1.40E-03 |
| intracellular signal transduction (GO:0035556)                      | 1.34 | 1.50E-02 |
| response to nitrogen compound (GO:1901698)                          | 1.33 | 2.87E-02 |
| regulation of cellular component biogenesis (GO:0044087)            | 1.33 | 3.61E-02 |
| regulation of organelle organization (GO:0033043)                   | 1.33 | 1.39E-02 |
| movement of cell or subcellular component (GO:0006928)              | 1.32 | 3.84E-02 |
| programmed cell death (GO:0012501)                                  | 1.32 | 3.84E-02 |
| macromolecule modification (GO:0043412)                             | 1.31 | 3.13E-03 |
| cell development (GO:0048468)                                       | 1.3  | 4.40E-02 |
| nervous system development (GO:0007399)                             | 1.27 | 3.06E-02 |
| protein-containing complex assembly (GO:0065003)                    | 1.27 | 2.47E-02 |
| cellular macromolecule metabolic process (GO:0044260)               | 1.27 | 7.70E-05 |

|                                                                                        |      |          |
|----------------------------------------------------------------------------------------|------|----------|
| protein-containing complex subunit organization (GO:0043933)                           | 1.26 | 1.97E-02 |
| cellular component assembly (GO:0022607)                                               | 1.25 | 8.13E-03 |
| cellular protein metabolic process (GO:0044267)                                        | 1.25 | 2.55E-03 |
| protein metabolic process (GO:0019538)                                                 | 1.24 | 1.80E-03 |
| regulation of signal transduction (GO:0009966)                                         | 1.22 | 2.42E-02 |
| cellular catabolic process (GO:0044248)                                                | 1.22 | 3.69E-02 |
| cell differentiation (GO:0030154)                                                      | 1.21 | 2.75E-02 |
| cellular developmental process (GO:0048869)                                            | 1.21 | 2.53E-02 |
| organic substance catabolic process (GO:1901575)                                       | 1.21 | 4.92E-02 |
| cellular component organization (GO:0016043)                                           | 1.2  | 5.62E-04 |
| catabolic process (GO:0009056)                                                         | 1.19 | 4.51E-02 |
| organelle organization (GO:0006996)                                                    | 1.18 | 1.32E-02 |
| cellular component biogenesis (GO:0044085)                                             | 1.18 | 2.71E-02 |
| cellular component organization or biogenesis (GO:0071840)                             | 1.17 | 1.80E-03 |
| organonitrogen compound metabolic process (GO:1901564)                                 | 1.17 | 6.19E-03 |
| multicellular organism development (GO:0007275)                                        | 1.16 | 4.06E-02 |
| macromolecule metabolic process (GO:0043170)                                           | 1.15 | 3.30E-03 |
| primary metabolic process (GO:0044238)                                                 | 1.14 | 8.08E-04 |
| nitrogen compound metabolic process (GO:0006807)                                       | 1.14 | 2.19E-03 |
| organic substance metabolic process (GO:0071704)                                       | 1.11 | 3.03E-03 |
| positive regulation of biological process (GO:0048518)                                 | 1.11 | 3.51E-02 |
| cellular metabolic process (GO:0044237)                                                | 1.11 | 5.09E-03 |
| metabolic process (GO:0008152)                                                         | 1.1  | 3.38E-03 |
| cellular process (GO:0009987)                                                          | 1.03 | 4.07E-02 |
| immune response (GO:0006955)                                                           | 0.76 | 4.40E-02 |
| response to biotic stimulus (GO:0009607)                                               | 0.7  | 1.54E-02 |
| biological process involved in interspecies interaction between organisms (GO:0044419) | 0.7  | 9.89E-03 |
| response to other organism (GO:0051707)                                                | 0.65 | 6.24E-03 |
| response to external biotic stimulus (GO:0043207)                                      | 0.65 | 6.24E-03 |
| defense response (GO:0006952)                                                          | 0.64 | 7.39E-03 |
| defense response to other organism (GO:0098542)                                        | 0.58 | 5.32E-03 |
| innate immune response (GO:0045087)                                                    | 0.48 | 1.74E-03 |
| organic acid biosynthetic process (GO:0016053)                                         | 0.47 | 4.57E-02 |
| carboxylic acid biosynthetic process (GO:0046394)                                      | 0.47 | 4.57E-02 |
| regulation of I-kappaB kinase/NF-kappaB signaling (GO:0043122)                         | 0.43 | 4.28E-02 |
| regulation of lipid metabolic process (GO:0019216)                                     | 0.36 | 3.29E-02 |
| vascular process in circulatory system (GO:0003018)                                    | 0.21 | 4.75E-02 |
| cellular response to xenobiotic stimulus (GO:0071466)                                  | 0.2  | 3.92E-02 |
| humoral immune response (GO:0006959)                                                   | 0.12 | 1.92E-03 |

**Table S6: Enriched GO biological processes in downregulated transcripts**

| <b>GO biological process complete</b>                                       | <b>Fold change</b> | <b>raw p-value</b> | <b>FDR</b> |
|-----------------------------------------------------------------------------|--------------------|--------------------|------------|
| mitochondrial translation (GO:0032543)                                      | 3.16               | 1.06E-05           | 1.65E-03   |
| establishment of protein localization to endoplasmic reticulum (GO:0072599) | 3.13               | 2.30E-04           | 2.36E-02   |
| cytoplasmic translation (GO:0002181)                                        | 3.11               | 5.01E-11           | 2.22E-08   |

|                                                                                |      |          |          |
|--------------------------------------------------------------------------------|------|----------|----------|
| protein K48-linked ubiquitination (GO:0070936)                                 | 2.87 | 2.64E-05 | 3.70E-03 |
| ribosomal large subunit biogenesis (GO:0042273)                                | 2.76 | 1.34E-05 | 2.00E-03 |
| protein localization to endoplasmic reticulum (GO:0070972)                     | 2.73 | 5.30E-05 | 6.75E-03 |
| mitochondrial gene expression (GO:0140053)                                     | 2.72 | 3.61E-06 | 6.24E-04 |
| Golgi to plasma membrane transport (GO:0006893)                                | 2.69 | 3.12E-04 | 3.13E-02 |
| translation (GO:0006412)                                                       | 2.66 | 7.12E-20 | 1.11E-16 |
| peptide biosynthetic process (GO:0043043)                                      | 2.54 | 1.28E-18 | 1.53E-15 |
| ribosomal small subunit biogenesis (GO:0042274)                                | 2.35 | 3.88E-04 | 3.68E-02 |
| peptide metabolic process (GO:0006518)                                         | 2.29 | 3.46E-18 | 3.83E-15 |
| oxidative phosphorylation (GO:0006119)                                         | 2.24 | 6.07E-05 | 7.54E-03 |
| rRNA processing (GO:0006364)                                                   | 2.22 | 3.12E-08 | 7.83E-06 |
| regulation of mRNA splicing, via spliceosome (GO:0048024)                      | 2.18 | 2.14E-04 | 2.25E-02 |
| amide biosynthetic process (GO:0043604)                                        | 2.16 | 5.53E-15 | 5.37E-12 |
| rRNA metabolic process (GO:0016072)                                            | 2.15 | 7.37E-08 | 1.76E-05 |
| ribosome biogenesis (GO:0042254)                                               | 2.14 | 1.65E-09 | 4.94E-07 |
| post-Golgi vesicle-mediated transport (GO:0006892)                             | 2.12 | 5.15E-04 | 4.45E-02 |
| vesicle-mediated transport to the plasma membrane (GO:0098876)                 | 2.08 | 2.04E-04 | 2.17E-02 |
| protein polyubiquitination (GO:0000209)                                        | 2.03 | 2.02E-06 | 3.61E-04 |
| protein modification by small protein removal (GO:0070646)                     | 2.03 | 1.31E-04 | 1.51E-02 |
| ncRNA processing (GO:0034470)                                                  | 2    | 7.99E-10 | 2.70E-07 |
| ribonucleoprotein complex biogenesis (GO:0022613)                              | 1.95 | 7.17E-10 | 2.47E-07 |
| protein folding (GO:0006457)                                                   | 1.94 | 4.33E-05 | 5.66E-03 |
| negative regulation of translation (GO:0017148)                                | 1.93 | 1.25E-04 | 1.47E-02 |
| proteolysis involved in cellular protein catabolic process (GO:0051603)        | 1.91 | 2.48E-12 | 1.38E-09 |
| Golgi vesicle transport (GO:0048193)                                           | 1.9  | 1.22E-06 | 2.28E-04 |
| endosomal transport (GO:0016197)                                               | 1.89 | 3.08E-05 | 4.27E-03 |
| cellular protein catabolic process (GO:0044257)                                | 1.88 | 3.36E-12 | 1.68E-09 |
| modification-dependent protein catabolic process (GO:0019941)                  | 1.88 | 1.50E-10 | 6.13E-08 |
| regulation of RNA splicing (GO:0043484)                                        | 1.88 | 5.21E-04 | 4.47E-02 |
| ncRNA metabolic process (GO:0034660)                                           | 1.86 | 2.90E-09 | 8.51E-07 |
| modification-dependent macromolecule catabolic process (GO:0043632)            | 1.85 | 2.67E-10 | 1.04E-07 |
| proteasomal protein catabolic process (GO:0010498)                             | 1.85 | 4.74E-07 | 9.55E-05 |
| proteasome-mediated ubiquitin-dependent protein catabolic process (GO:0043161) | 1.84 | 2.48E-06 | 4.34E-04 |
| ubiquitin-dependent protein catabolic process (GO:0006511)                     | 1.84 | 1.18E-09 | 3.74E-07 |
| negative regulation of cellular amide metabolic process (GO:0034249)           | 1.83 | 2.11E-04 | 2.23E-02 |
| protein catabolic process (GO:0030163)                                         | 1.81 | 1.64E-11 | 7.70E-09 |
| cellular amide metabolic process (GO:0043603)                                  | 1.81 | 1.04E-12 | 6.71E-10 |
| regulation of protein stability (GO:0031647)                                   | 1.79 | 1.08E-05 | 1.66E-03 |
| ribonucleoprotein complex assembly (GO:0022618)                                | 1.79 | 4.43E-04 | 4.12E-02 |
| cellular macromolecule catabolic process (GO:0044265)                          | 1.78 | 5.32E-13 | 3.93E-10 |
| ribonucleoprotein complex subunit organization (GO:0071826)                    | 1.77 | 4.91E-04 | 4.31E-02 |
| RNA processing (GO:0006396)                                                    | 1.76 | 5.66E-13 | 4.00E-10 |

|                                                                           |      |          |          |
|---------------------------------------------------------------------------|------|----------|----------|
| protein modification by small protein conjugation or removal (GO:0070647) | 1.76 | 1.18E-12 | 7.32E-10 |
| protein ubiquitination (GO:0016567)                                       | 1.72 | 1.61E-09 | 4.91E-07 |
| protein modification by small protein conjugation (GO:0032446)            | 1.72 | 4.06E-10 | 1.50E-07 |
| macromolecule catabolic process (GO:0009057)                              | 1.71 | 3.00E-12 | 1.55E-09 |
| gene expression (GO:0010467)                                              | 1.67 | 8.32E-24 | 2.15E-20 |
| regulation of mRNA metabolic process (GO:1903311)                         | 1.67 | 1.70E-04 | 1.88E-02 |
| vesicle organization (GO:0016050)                                         | 1.63 | 4.81E-04 | 4.27E-02 |
| RNA metabolic process (GO:0016070)                                        | 1.63 | 3.79E-15 | 3.92E-12 |
| regulation of translation (GO:0006417)                                    | 1.62 | 4.26E-05 | 5.60E-03 |
| cellular nitrogen compound biosynthetic process (GO:0044271)              | 1.62 | 3.06E-13 | 2.37E-10 |
| histone modification (GO:0016570)                                         | 1.58 | 2.60E-04 | 2.64E-02 |
| mRNA metabolic process (GO:0016071)                                       | 1.57 | 6.12E-06 | 1.01E-03 |
| regulation of cellular amide metabolic process (GO:0034248)               | 1.56 | 5.79E-05 | 7.26E-03 |
| covalent chromatin modification (GO:0016569)                              | 1.56 | 3.81E-04 | 3.65E-02 |
| posttranscriptional regulation of gene expression (GO:0010608)            | 1.55 | 4.08E-05 | 5.41E-03 |
| RNA splicing (GO:0008380)                                                 | 1.54 | 5.70E-04 | 4.82E-02 |
| cellular macromolecule biosynthetic process (GO:0034645)                  | 1.52 | 1.37E-10 | 5.74E-08 |
| cellular protein metabolic process (GO:0044267)                           | 1.51 | 2.44E-25 | 1.26E-21 |
| mRNA processing (GO:0006397)                                              | 1.5  | 3.25E-04 | 3.24E-02 |
| macromolecule biosynthetic process (GO:0009059)                           | 1.5  | 2.68E-10 | 1.02E-07 |
| positive regulation of cellular catabolic process (GO:0031331)            | 1.5  | 4.62E-04 | 4.17E-02 |
| mitochondrion organization (GO:0007005)                                   | 1.49 | 5.95E-04 | 5.00E-02 |
| organonitrogen compound catabolic process (GO:1901565)                    | 1.48 | 2.15E-07 | 4.70E-05 |
| nucleic acid metabolic process (GO:0090304)                               | 1.45 | 1.32E-12 | 7.89E-10 |
| cellular catabolic process (GO:0044248)                                   | 1.45 | 4.44E-10 | 1.60E-07 |
| organonitrogen compound biosynthetic process (GO:1901566)                 | 1.44 | 8.51E-08 | 2.00E-05 |
| cellular nitrogen compound metabolic process (GO:0034641)                 | 1.44 | 1.72E-19 | 2.42E-16 |
| proteolysis (GO:0006508)                                                  | 1.44 | 3.95E-07 | 8.07E-05 |
| intracellular transport (GO:0046907)                                      | 1.42 | 2.92E-07 | 6.21E-05 |
| chromatin organization (GO:0006325)                                       | 1.4  | 3.32E-04 | 3.28E-02 |
| cellular macromolecule metabolic process (GO:0044260)                     | 1.4  | 4.67E-24 | 1.45E-20 |
| nucleobase-containing compound metabolic process (GO:0006139)             | 1.4  | 1.65E-12 | 9.49E-10 |
| protein metabolic process (GO:0019538)                                    | 1.39 | 3.18E-19 | 4.12E-16 |
| cellular protein-containing complex assembly (GO:0034622)                 | 1.39 | 1.75E-04 | 1.92E-02 |
| heterocycle metabolic process (GO:0046483)                                | 1.38 | 2.85E-12 | 1.53E-09 |
| organic substance catabolic process (GO:1901575)                          | 1.38 | 1.74E-07 | 3.86E-05 |
| heterocycle biosynthetic process (GO:0018130)                             | 1.38 | 2.20E-04 | 2.28E-02 |
| nucleobase-containing compound biosynthetic process (GO:0034654)          | 1.37 | 4.51E-04 | 4.12E-02 |
| catabolic process (GO:0009056)                                            | 1.36 | 3.21E-08 | 7.93E-06 |
| macromolecule metabolic process (GO:0043170)                              | 1.35 | 4.85E-27 | 3.77E-23 |
| establishment of protein localization (GO:0045184)                        | 1.35 | 9.16E-06 | 1.47E-03 |
| vesicle-mediated transport (GO:0016192)                                   | 1.35 | 8.31E-06 | 1.35E-03 |
| cellular aromatic compound metabolic process (GO:0006725)                 | 1.34 | 1.15E-10 | 4.95E-08 |



|                                                                             |      |          |          |
|-----------------------------------------------------------------------------|------|----------|----------|
| negative regulation of cellular protein metabolic process (GO:0032269)      | 1.34 | 2.20E-04 | 2.30E-02 |
| protein transport (GO:0015031)                                              | 1.33 | 4.51E-05 | 5.84E-03 |
| macromolecule modification (GO:0043412)                                     | 1.33 | 1.53E-10 | 6.11E-08 |
| negative regulation of protein metabolic process (GO:0051248)               | 1.32 | 3.95E-04 | 3.72E-02 |
| cellular protein modification process (GO:0006464)                          | 1.31 | 7.87E-09 | 2.14E-06 |
| protein modification process (GO:0036211)                                   | 1.31 | 7.87E-09 | 2.11E-06 |
| cellular biosynthetic process (GO:0044249)                                  | 1.31 | 8.93E-08 | 2.07E-05 |
| cellular metabolic process (GO:0044237)                                     | 1.31 | 1.94E-28 | 3.01E-24 |
| nitrogen compound metabolic process (GO:0006807)                            | 1.3  | 8.13E-23 | 1.58E-19 |
| organic cyclic compound metabolic process (GO:1901360)                      | 1.29 | 4.53E-09 | 1.28E-06 |
| establishment of localization in cell (GO:0051649)                          | 1.29 | 2.60E-05 | 3.68E-03 |
| organic substance biosynthetic process (GO:1901576)                         | 1.29 | 3.88E-07 | 8.04E-05 |
| primary metabolic process (GO:0044238)                                      | 1.28 | 2.41E-23 | 5.36E-20 |
| organonitrogen compound metabolic process (GO:1901564)                      | 1.28 | 5.97E-14 | 5.16E-11 |
| biosynthetic process (GO:0009058)                                           | 1.27 | 1.22E-06 | 2.26E-04 |
| cellular macromolecule localization (GO:0070727)                            | 1.26 | 3.87E-04 | 3.69E-02 |
| cellular protein localization (GO:0034613)                                  | 1.26 | 4.58E-04 | 4.16E-02 |
| metabolic process (GO:0008152)                                              | 1.26 | 2.83E-24 | 1.10E-20 |
| organic substance metabolic process (GO:0071704)                            | 1.25 | 2.25E-21 | 3.88E-18 |
| cellular localization (GO:0051641)                                          | 1.25 | 1.10E-05 | 1.67E-03 |
| nitrogen compound transport (GO:0071705)                                    | 1.25 | 3.34E-04 | 3.29E-02 |
| negative regulation of nitrogen compound metabolic process (GO:0051172)     | 1.22 | 7.67E-05 | 9.32E-03 |
| protein localization (GO:0008104)                                           | 1.21 | 4.91E-04 | 4.33E-02 |
| regulation of macromolecule biosynthetic process (GO:0010556)               | 1.2  | 1.10E-06 | 2.08E-04 |
| cellular component biogenesis (GO:0044085)                                  | 1.2  | 1.61E-04 | 1.81E-02 |
| regulation of nucleobase-containing compound metabolic process (GO:0019219) | 1.2  | 1.52E-06 | 2.75E-04 |
| negative regulation of cellular metabolic process (GO:0031324)              | 1.2  | 1.74E-04 | 1.91E-02 |
| organelle organization (GO:0006996)                                         | 1.2  | 9.72E-06 | 1.53E-03 |
| regulation of cellular macromolecule biosynthetic process (GO:2000112)      | 1.2  | 2.05E-06 | 3.62E-04 |
| macromolecule localization (GO:0033036)                                     | 1.19 | 5.41E-04 | 4.61E-02 |
| regulation of RNA metabolic process (GO:0051252)                            | 1.19 | 1.39E-05 | 2.05E-03 |
| regulation of gene expression (GO:0010468)                                  | 1.18 | 5.50E-07 | 1.10E-04 |
| negative regulation of macromolecule metabolic process (GO:0010605)         | 1.18 | 3.52E-04 | 3.44E-02 |
| regulation of biosynthetic process (GO:0009889)                             | 1.18 | 7.45E-06 | 1.22E-03 |
| regulation of cellular biosynthetic process (GO:0031326)                    | 1.18 | 9.28E-06 | 1.47E-03 |
| regulation of primary metabolic process (GO:0080090)                        | 1.16 | 3.64E-07 | 7.64E-05 |
| regulation of nitrogen compound metabolic process (GO:0051171)              | 1.16 | 8.03E-07 | 1.54E-04 |
| regulation of cellular metabolic process (GO:0031323)                       | 1.16 | 6.46E-07 | 1.27E-04 |
| regulation of macromolecule metabolic process (GO:0060255)                  | 1.15 | 1.34E-06 | 2.44E-04 |
| regulation of metabolic process (GO:0019222)                                | 1.13 | 5.55E-06 | 9.37E-04 |
| cellular component organization or biogenesis (GO:0071840)                  | 1.11 | 4.46E-04 | 4.12E-02 |

|                                                                                        |      |          |          |
|----------------------------------------------------------------------------------------|------|----------|----------|
| response to stimulus (GO:0050896)                                                      | 0.89 | 2.03E-05 | 2.95E-03 |
| cellular response to stimulus (GO:0051716)                                             | 0.87 | 1.81E-05 | 2.65E-03 |
| developmental process (GO:0032502)                                                     | 0.84 | 6.65E-07 | 1.29E-04 |
| multicellular organism development (GO:0007275)                                        | 0.84 | 1.24E-05 | 1.86E-03 |
| system development (GO:0048731)                                                        | 0.84 | 2.18E-05 | 3.11E-03 |
| cellular developmental process (GO:0048869)                                            | 0.83 | 4.85E-05 | 6.23E-03 |
| cell differentiation (GO:0030154)                                                      | 0.82 | 3.62E-05 | 4.98E-03 |
| anatomical structure development (GO:0048856)                                          | 0.82 | 1.37E-07 | 3.08E-05 |
| anatomical structure morphogenesis (GO:0009653)                                        | 0.79 | 1.28E-04 | 1.48E-02 |
| cell surface receptor signaling pathway (GO:0007166)                                   | 0.77 | 7.71E-05 | 9.29E-03 |
| multicellular organismal process (GO:0032501)                                          | 0.77 | 5.87E-15 | 5.36E-12 |
| reproductive process (GO:0022414)                                                      | 0.76 | 4.95E-04 | 4.32E-02 |
| cell communication (GO:0007154)                                                        | 0.76 | 6.41E-12 | 3.11E-09 |
| reproduction (GO:0000003)                                                              | 0.76 | 4.46E-04 | 4.10E-02 |
| neurogenesis (GO:0022008)                                                              | 0.75 | 4.70E-04 | 4.20E-02 |
| signal transduction (GO:0007165)                                                       | 0.75 | 2.10E-11 | 9.61E-09 |
| signaling (GO:0023052)                                                                 | 0.74 | 1.01E-12 | 6.85E-10 |
| cell development (GO:0048468)                                                          | 0.74 | 7.62E-05 | 9.32E-03 |
| movement of cell or subcellular component (GO:0006928)                                 | 0.73 | 1.01E-04 | 1.21E-02 |
| generation of neurons (GO:0048699)                                                     | 0.73 | 2.33E-04 | 2.38E-02 |
| cytoskeleton organization (GO:0007010)                                                 | 0.72 | 1.95E-04 | 2.09E-02 |
| negative regulation of multicellular organismal process (GO:0051241)                   | 0.7  | 2.91E-04 | 2.94E-02 |
| locomotion (GO:0040011)                                                                | 0.69 | 4.05E-05 | 5.42E-03 |
| nervous system process (GO:0050877)                                                    | 0.66 | 2.04E-05 | 2.93E-03 |
| system process (GO:0003008)                                                            | 0.65 | 2.05E-08 | 5.23E-06 |
| actin filament-based process (GO:0030029)                                              | 0.6  | 1.85E-04 | 2.01E-02 |
| regulation of ion transport (GO:0043269)                                               | 0.59 | 5.52E-05 | 6.97E-03 |
| cell junction organization (GO:0034330)                                                | 0.58 | 4.64E-04 | 4.16E-02 |
| actin cytoskeleton organization (GO:0030036)                                           | 0.58 | 1.64E-04 | 1.84E-02 |
| cell adhesion (GO:0007155)                                                             | 0.53 | 1.65E-08 | 4.26E-06 |
| biological adhesion (GO:0022610)                                                       | 0.52 | 1.20E-08 | 3.16E-06 |
| cell-cell adhesion (GO:0098609)                                                        | 0.48 | 4.60E-06 | 7.86E-04 |
| regulation of calcium ion transport (GO:0051924)                                       | 0.42 | 3.54E-04 | 3.42E-02 |
| sensory perception (GO:0007600)                                                        | 0.4  | 1.61E-09 | 5.00E-07 |
| adenylate cyclase-modulating G protein-coupled receptor signaling pathway (GO:0007188) | 0.37 | 3.54E-04 | 3.44E-02 |
| G protein-coupled receptor signaling pathway (GO:0007186)                              | 0.36 | 7.35E-14 | 6.01E-11 |
| negative regulation of cell development (GO:0010721)                                   | 0.34 | 4.18E-04 | 3.92E-02 |
| detection of stimulus (GO:0051606)                                                     | 0.27 | 5.50E-09 | 1.53E-06 |
| detection of abiotic stimulus (GO:0009582)                                             | 0.26 | 5.12E-04 | 4.45E-02 |
| cilium movement (GO:0003341)                                                           | 0.23 | 1.20E-04 | 1.41E-02 |
| potassium ion transmembrane transport (GO:0071805)                                     | 0.22 | 6.62E-05 | 8.17E-03 |
| cilium movement involved in cell motility (GO:0060294)                                 | 0.17 | 5.49E-04 | 4.66E-02 |
| detection of chemical stimulus (GO:0009593)                                            | 0.16 | 2.53E-07 | 5.46E-05 |
| sensory perception of smell (GO:0007608)                                               | 0.16 | 5.80E-06 | 9.68E-04 |
| sensory perception of chemical stimulus (GO:0007606)                                   | 0.15 | 1.08E-07 | 2.46E-05 |
| cilium-dependent cell motility (GO:0060285)                                            | 0.15 | 1.37E-04 | 1.57E-02 |
| cilium or flagellum-dependent cell motility (GO:0001539)                               | 0.15 | 1.37E-04 | 1.56E-02 |

|                                                                                     |        |          |          |
|-------------------------------------------------------------------------------------|--------|----------|----------|
| detection of stimulus involved in sensory perception (GO:0050906)                   | 0.1    | 8.46E-10 | 2.80E-07 |
| cell-cell adhesion via plasma-membrane adhesion molecules (GO:0098742)              | 0.1    | 6.02E-10 | 2.13E-07 |
| action potential (GO:0001508)                                                       | 0.09   | 1.88E-04 | 2.03E-02 |
| homophilic cell adhesion via plasma membrane adhesion molecules (GO:0007156)        | < 0.01 | 3.59E-09 | 1.03E-06 |
| cellular response to chemokine (GO:1990869)                                         | < 0.01 | 3.72E-05 | 5.07E-03 |
| response to chemokine (GO:1990868)                                                  | < 0.01 | 3.72E-05 | 5.02E-03 |
| detection of chemical stimulus involved in sensory perception of smell (GO:0050911) | < 0.01 | 4.38E-08 | 1.06E-05 |
| detection of chemical stimulus involved in sensory perception (GO:0050907)          | < 0.01 | 9.05E-10 | 2.93E-07 |
| chemokine-mediated signaling pathway (GO:0070098)                                   | < 0.01 | 1.14E-04 | 1.35E-02 |

**Table S7: Enriched GO biological processes in upregulated transcripts**

| <b>GO biological process complete</b>                                                       | <b>Fold change</b> | <b>p-value</b> |
|---------------------------------------------------------------------------------------------|--------------------|----------------|
| arginine catabolic process to proline (GO:0019493)                                          | > 100              | 8.39E-03       |
| axonemal microtubule depolymerization (GO:0060404)                                          | > 100              | 8.39E-03       |
| negative regulation of proteoglycan biosynthetic process (GO:1902729)                       | > 100              | 8.39E-03       |
| lymphocyte chemotaxis across high endothelial venule (GO:0002518)                           | > 100              | 8.39E-03       |
| arginine catabolic process to proline via ornithine (GO:0010121)                            | > 100              | 8.39E-03       |
| sagittal suture morphogenesis (GO:0060367)                                                  | > 100              | 8.39E-03       |
| lambdoid suture morphogenesis (GO:0060366)                                                  | > 100              | 8.39E-03       |
| lateral ganglionic eminence cell proliferation (GO:0022018)                                 | > 100              | 8.39E-03       |
| subpallium cell proliferation in forebrain (GO:0022012)                                     | > 100              | 8.39E-03       |
| neural crest cell migration involved in sympathetic nervous system development (GO:1903045) | > 100              | 8.39E-03       |
| negative regulation of endothelial cell chemotaxis to fibroblast growth factor (GO:2000545) | > 100              | 8.39E-03       |
| negative regulation of connective tissue growth factor production (GO:0032683)              | > 100              | 8.39E-03       |
| fibroblast growth factor receptor apoptotic signaling pathway (GO:1902178)                  | > 100              | 8.39E-03       |
| regulation of prostaglandin catabolic process (GO:1905828)                                  | > 100              | 8.39E-03       |
| plus-end specific microtubule depolymerization (GO:0070462)                                 | > 100              | 8.39E-03       |
| fast-twitch skeletal muscle fiber contraction (GO:0031443)                                  | > 100              | 8.39E-03       |
| negative regulation of cell chemotaxis to fibroblast growth factor (GO:1904848)             | > 100              | 8.39E-03       |
| endothelial cell chemotaxis to fibroblast growth factor (GO:0035768)                        | > 100              | 8.39E-03       |
| cell chemotaxis to fibroblast growth factor (GO:0035766)                                    | > 100              | 8.39E-03       |
| triglyceride acyl-chain remodeling (GO:0036153)                                             | > 100              | 8.39E-03       |
| negative regulation of hair cycle (GO:0042636)                                              | > 100              | 8.39E-03       |
| mating plug formation (GO:0042628)                                                          | > 100              | 8.39E-03       |
| xenobiotic transport across blood-nerve barrier (GO:0061772)                                | > 100              | 8.39E-03       |
| cytoplasmic microtubule depolymerization (GO:0010938)                                       | > 100              | 8.39E-03       |
| helper T cell enhancement of adaptive immune response (GO:0035397)                          | > 100              | 8.39E-03       |
| fumarate transport (GO:0015741)                                                             | > 100              | 8.39E-03       |

|                                                                                                                    |       |          |
|--------------------------------------------------------------------------------------------------------------------|-------|----------|
| cilium disassembly (GO:0061523)                                                                                    | > 100 | 8.39E-03 |
| endocardial cushion cell fate commitment (GO:0061445)                                                              | > 100 | 8.39E-03 |
| substantia propria of cornea development (GO:1903701)                                                              | > 100 | 8.39E-03 |
| endocardial cell fate commitment (GO:0060957)                                                                      | > 100 | 8.39E-03 |
| lateral semicircular canal development (GO:0060875)                                                                | > 100 | 8.39E-03 |
| anterior semicircular canal development (GO:0060873)                                                               | > 100 | 8.39E-03 |
| cellular response to butyrate (GO:1903545)                                                                         | > 100 | 8.39E-03 |
| response to butyrate (GO:1903544)                                                                                  | > 100 | 8.39E-03 |
| negative regulation of lipoprotein oxidation (GO:0034443)                                                          | > 100 | 8.39E-03 |
| regulation of lipoprotein oxidation (GO:0034442)                                                                   | > 100 | 8.39E-03 |
| seminal vesicle epithelium development (GO:0061108)                                                                | > 100 | 8.39E-03 |
| seminal vesicle development (GO:0061107)                                                                           | > 100 | 8.39E-03 |
| arginine catabolic process to glutamate (GO:0019544)                                                               | > 100 | 8.39E-03 |
| negative regulation of lipoprotein lipid oxidation (GO:0060588)                                                    | > 100 | 8.39E-03 |
| regulation of lipoprotein lipid oxidation (GO:0060587)                                                             | > 100 | 8.39E-03 |
| induction by virus of host cell-cell fusion (GO:0006948)                                                           | 59.38 | 1.67E-02 |
| frontal suture morphogenesis (GO:0060364)                                                                          | 59.38 | 1.67E-02 |
| B-1a B cell differentiation (GO:0002337)                                                                           | 59.38 | 1.67E-02 |
| CXCL12-activated CXCR4 signaling pathway (GO:0038160)                                                              | 59.38 | 1.67E-02 |
| C-X-C chemokine receptor CXCR4 signaling pathway (GO:0038159)                                                      | 59.38 | 1.67E-02 |
| positive regulation of macrophage migration inhibitory factor signaling pathway (GO:2000448)                       | 59.38 | 1.67E-02 |
| positive regulation of polyamine transmembrane transport (GO:1902269)                                              | 59.38 | 1.67E-02 |
| positive regulation of interleukin-21 production (GO:0032745)                                                      | 59.38 | 1.67E-02 |
| regulation of apoptotic process involved in outflow tract morphogenesis (GO:1902256)                               | 59.38 | 1.67E-02 |
| regulation of interleukin-21 production (GO:0032665)                                                               | 59.38 | 1.67E-02 |
| regulation of connective tissue growth factor production (GO:0032643)                                              | 59.38 | 1.67E-02 |
| positive regulation of timing of catagen (GO:0051795)                                                              | 59.38 | 1.67E-02 |
| mesenchymal cell migration (GO:0090497)                                                                            | 59.38 | 1.67E-02 |
| negative regulation of bile acid biosynthetic process (GO:0070858)                                                 | 59.38 | 1.67E-02 |
| response to ultrasound (GO:1990478)                                                                                | 59.38 | 1.67E-02 |
| negative regulation of smooth muscle cell-matrix adhesion (GO:2000098)                                             | 59.38 | 1.67E-02 |
| positive regulation of determination of dorsal identity (GO:2000017)                                               | 59.38 | 1.67E-02 |
| G1 phase (GO:0051318)                                                                                              | 59.38 | 1.67E-02 |
| larynx development (GO:0120224)                                                                                    | 59.38 | 1.67E-02 |
| larynx morphogenesis (GO:0120223)                                                                                  | 59.38 | 1.67E-02 |
| zinc ion import into synaptic vesicle (GO:0099180)                                                                 | 59.38 | 1.67E-02 |
| trans-Golgi network membrane organization (GO:0098629)                                                             | 59.38 | 1.67E-02 |
| negative regulation of memory T cell differentiation (GO:0043381)                                                  | 59.38 | 1.67E-02 |
| cellular response to 3,3',5-triiodo-L-thyronine (GO:1905243)                                                       | 59.38 | 1.67E-02 |
| tricarboxylic acid transmembrane transport (GO:0035674)                                                            | 59.38 | 1.67E-02 |
| uterine wall breakdown (GO:0042704)                                                                                | 59.38 | 1.67E-02 |
| mitotic G1 phase (GO:0000080)                                                                                      | 59.38 | 1.67E-02 |
| negative regulation of epithelial to mesenchymal transition involved in endocardial cushion formation (GO:1905006) | 59.38 | 1.67E-02 |
| negative regulation of phospholipase A2 activity (GO:1900138)                                                      | 59.38 | 5.51E-04 |
| zinc ion import into organelle (GO:0062111)                                                                        | 59.38 | 1.67E-02 |
| galactose transmembrane transport (GO:0015757)                                                                     | 59.38 | 1.67E-02 |

|                                                                                                                    |       |          |
|--------------------------------------------------------------------------------------------------------------------|-------|----------|
| negative regulation of cardiac epithelial to mesenchymal transition (GO:0062044)                                   | 59.38 | 1.67E-02 |
| negative regulation of bile acid metabolic process (GO:1904252)                                                    | 59.38 | 1.67E-02 |
| endocardial cushion cell differentiation (GO:0061443)                                                              | 59.38 | 1.67E-02 |
| thymocyte migration (GO:0072679)                                                                                   | 59.38 | 1.67E-02 |
| endocardial cushion fusion (GO:0003274)                                                                            | 59.38 | 5.51E-04 |
| agmatine biosynthetic process (GO:0097055)                                                                         | 59.38 | 1.67E-02 |
| mammary gland specification (GO:0060594)                                                                           | 59.38 | 1.67E-02 |
| negative regulation of serine-type peptidase activity (GO:1902572)                                                 | 47.5  | 8.56E-04 |
| positive regulation of epithelial to mesenchymal transition involved in endocardial cushion formation (GO:1905007) | 47.5  | 8.56E-04 |
| negative regulation of serine-type endopeptidase activity (GO:1900004)                                             | 47.5  | 8.56E-04 |
| cell adhesion involved in heart morphogenesis (GO:0061343)                                                         | 47.5  | 8.56E-04 |
| atrial septum primum morphogenesis (GO:0003289)                                                                    | 47.5  | 8.56E-04 |
| septum primum development (GO:0003284)                                                                             | 47.5  | 8.56E-04 |
| dichotomous subdivision of terminal units involved in salivary gland branching (GO:0060666)                        | 47.5  | 8.56E-04 |
| positive regulation of integrin biosynthetic process (GO:0045726)                                                  | 39.58 | 2.49E-02 |
| smoothened signaling pathway involved in spinal cord motor neuron cell fate specification (GO:0021776)             | 39.58 | 2.49E-02 |
| smoothened signaling pathway involved in ventral spinal cord interneuron specification (GO:0021775)                | 39.58 | 2.49E-02 |
| voluntary skeletal muscle contraction (GO:0003010)                                                                 | 39.58 | 2.49E-02 |
| positive regulation of synaptic vesicle clustering (GO:2000809)                                                    | 39.58 | 2.49E-02 |
| JUN phosphorylation (GO:0007258)                                                                                   | 39.58 | 2.49E-02 |
| neural fold elevation formation (GO:0021502)                                                                       | 39.58 | 2.49E-02 |
| CD8-positive, gamma-delta intraepithelial T cell differentiation (GO:0002305)                                      | 39.58 | 2.49E-02 |
| gamma-delta intraepithelial T cell differentiation (GO:0002304)                                                    | 39.58 | 2.49E-02 |
| putrescine biosynthetic process from ornithine (GO:0033387)                                                        | 39.58 | 2.49E-02 |
| negative regulation of integrin-mediated signaling pathway (GO:2001045)                                            | 39.58 | 2.49E-02 |
| regulation of macrophage migration inhibitory factor signaling pathway (GO:2000446)                                | 39.58 | 2.49E-02 |
| male anatomical structure morphogenesis (GO:0090598)                                                               | 39.58 | 2.49E-02 |
| regulation of timing of catagen (GO:0051794)                                                                       | 39.58 | 2.49E-02 |
| male genitalia morphogenesis (GO:0048808)                                                                          | 39.58 | 2.49E-02 |
| negative regulation of thrombin-activated receptor signaling pathway (GO:0070495)                                  | 39.58 | 2.49E-02 |
| regulation of thrombin-activated receptor signaling pathway (GO:0070494)                                           | 39.58 | 2.49E-02 |
| nose morphogenesis (GO:0043585)                                                                                    | 39.58 | 2.49E-02 |
| positive regulation of mesenchymal stem cell migration (GO:1905322)                                                | 39.58 | 2.49E-02 |
| regulation of mesenchymal stem cell migration (GO:1905320)                                                         | 39.58 | 2.49E-02 |
| response to 3,3',5-triiodo-L-thyronine (GO:1905242)                                                                | 39.58 | 2.49E-02 |
| allantois development (GO:1905069)                                                                                 | 39.58 | 2.49E-02 |
| regulation of epithelial to mesenchymal transition involved in endocardial cushion formation (GO:1905005)          | 39.58 | 1.23E-03 |
| cellular magnesium ion homeostasis (GO:0010961)                                                                    | 39.58 | 2.49E-02 |
| basal dendrite arborization (GO:0150020)                                                                           | 39.58 | 2.49E-02 |
| basal dendrite morphogenesis (GO:0150019)                                                                          | 39.58 | 2.49E-02 |
| basal dendrite development (GO:0150018)                                                                            | 39.58 | 2.49E-02 |

|                                                                                      |       |          |
|--------------------------------------------------------------------------------------|-------|----------|
| negative regulation of alkaline phosphatase activity (GO:0010693)                    | 39.58 | 2.49E-02 |
| chondroitin sulfate catabolic process (GO:0030207)                                   | 39.58 | 2.49E-02 |
| neuroligin clustering involved in postsynaptic membrane assembly (GO:0097118)        | 39.58 | 2.49E-02 |
| twitch skeletal muscle contraction (GO:0014721)                                      | 39.58 | 2.49E-02 |
| facioacoustic ganglion development (GO:1903375)                                      | 39.58 | 2.49E-02 |
| regulation of postsynaptic density protein 95 clustering (GO:1902897)                | 39.58 | 2.49E-02 |
| regulation of serine-type peptidase activity (GO:1902571)                            | 33.93 | 1.66E-03 |
| regulation of serine-type endopeptidase activity (GO:1900003)                        | 33.93 | 1.66E-03 |
| positive regulation of proteoglycan biosynthetic process (GO:1902730)                | 29.69 | 3.31E-02 |
| negative regulation of T-helper 2 cell differentiation (GO:0045629)                  | 29.69 | 3.31E-02 |
| tricarboxylic acid transport (GO:0006842)                                            | 29.69 | 3.31E-02 |
| negative regulation of receptor recycling (GO:0001920)                               | 29.69 | 3.31E-02 |
| positive regulation of MHC class I biosynthetic process (GO:0045345)                 | 29.69 | 3.31E-02 |
| negative regulation of endothelial cell chemotaxis (GO:2001027)                      | 29.69 | 3.31E-02 |
| regulation of integrin biosynthetic process (GO:0045113)                             | 29.69 | 3.31E-02 |
| cellular response to lead ion (GO:0071284)                                           | 29.69 | 3.31E-02 |
| positive regulation of hair follicle maturation (GO:0048818)                         | 29.69 | 3.31E-02 |
| regulation of smooth muscle cell-matrix adhesion (GO:2000097)                        | 29.69 | 3.31E-02 |
| negative regulation of cortisol biosynthetic process (GO:2000065)                    | 29.69 | 3.31E-02 |
| negative regulation of aldosterone biosynthetic process (GO:0032348)                 | 29.69 | 3.31E-02 |
| negative regulation of aldosterone metabolic process (GO:0032345)                    | 29.69 | 3.31E-02 |
| regulation of determination of dorsal identity (GO:2000015)                          | 29.69 | 3.31E-02 |
| negative regulation of hydrogen peroxide-mediated programmed cell death (GO:1901299) | 29.69 | 3.31E-02 |
| positive regulation of response to nutrient levels (GO:0032109)                      | 29.69 | 3.31E-02 |
| positive regulation of response to extracellular stimulus (GO:0032106)               | 29.69 | 3.31E-02 |
| positive regulation of appetite (GO:0032100)                                         | 29.69 | 3.31E-02 |
| ventral trunk neural crest cell migration (GO:0036486)                               | 29.69 | 3.31E-02 |
| trunk neural crest cell migration (GO:0036484)                                       | 29.69 | 3.31E-02 |
| positive regulation of response to food (GO:0032097)                                 | 29.69 | 3.31E-02 |
| ascending aorta morphogenesis (GO:0035910)                                           | 29.69 | 3.31E-02 |
| negative regulation of aspartic-type peptidase activity (GO:1905246)                 | 29.69 | 3.31E-02 |
| acylglycerol acyl-chain remodeling (GO:0036155)                                      | 29.69 | 3.31E-02 |
| protein import into peroxisome matrix, docking (GO:0016560)                          | 29.69 | 3.31E-02 |
| positive regulation of vascular wound healing (GO:0035470)                           | 29.69 | 3.31E-02 |
| negative regulation of macrophage cytokine production (GO:0010936)                   | 29.69 | 3.31E-02 |
| citrate transport (GO:0015746)                                                       | 29.69 | 3.31E-02 |
| alpha-ketoglutarate transport (GO:0015742)                                           | 29.69 | 3.31E-02 |
| positive regulation of cardiac epithelial to mesenchymal transition (GO:0062043)     | 29.69 | 2.16E-03 |
| synaptic vesicle uncoating (GO:0016191)                                              | 29.69 | 3.31E-02 |
| trunk segmentation (GO:0035290)                                                      | 29.69 | 3.31E-02 |
| sympathetic neuron projection guidance (GO:0097491)                                  | 29.69 | 3.31E-02 |
| sympathetic neuron projection extension (GO:0097490)                                 | 29.69 | 3.31E-02 |
| positive regulation of nitric oxide mediated signal transduction (GO:0010750)        | 29.69 | 3.31E-02 |
| negative regulation of phospholipase activity (GO:0010519)                           | 29.69 | 2.16E-03 |
| negative regulation of extracellular matrix constituent secretion (GO:0003332)       | 29.69 | 3.31E-02 |

|                                                                                           |       |          |
|-------------------------------------------------------------------------------------------|-------|----------|
| smoothened signaling pathway involved in ventral spinal cord patterning (GO:0021910)      | 29.69 | 3.31E-02 |
| establishment of blood-nerve barrier (GO:0008065)                                         | 29.69 | 3.31E-02 |
| hypothalamic tangential migration using cell-axon interactions (GO:0021856)               | 29.69 | 3.31E-02 |
| gonadotrophin-releasing hormone neuronal migration to the hypothalamus (GO:0021828)       | 29.69 | 3.31E-02 |
| regulation of cardiac epithelial to mesenchymal transition (GO:0062042)                   | 26.39 | 2.71E-03 |
| dichotomous subdivision of an epithelial terminal unit (GO:0060600)                       | 26.39 | 2.71E-03 |
| hindgut morphogenesis (GO:0007442)                                                        | 23.75 | 4.12E-02 |
| negative regulation of megakaryocyte differentiation (GO:0045653)                         | 23.75 | 4.12E-02 |
| trigeminal nerve structural organization (GO:0021637)                                     | 23.75 | 4.12E-02 |
| trigeminal nerve morphogenesis (GO:0021636)                                               | 23.75 | 4.12E-02 |
| axonogenesis involved in innervation (GO:0060385)                                         | 23.75 | 4.12E-02 |
| clathrin coat disassembly (GO:0072318)                                                    | 23.75 | 4.12E-02 |
| B-1 B cell differentiation (GO:0001923)                                                   | 23.75 | 4.12E-02 |
| negative regulation of monocyte chemotactic protein-1 production (GO:0071638)             | 23.75 | 4.12E-02 |
| modulation by virus of host cellular process (GO:0019054)                                 | 23.75 | 4.12E-02 |
| chemokine (C-X-C motif) ligand 12 signaling pathway (GO:0038146)                          | 23.75 | 4.12E-02 |
| regulation of polyamine transmembrane transport (GO:1902267)                              | 23.75 | 4.12E-02 |
| [2Fe-2S] cluster assembly (GO:0044571)                                                    | 23.75 | 4.12E-02 |
| negative regulation of glucocorticoid biosynthetic process (GO:0031947)                   | 23.75 | 4.12E-02 |
| negative regulation of glucocorticoid metabolic process (GO:0031944)                      | 23.75 | 4.12E-02 |
| anterograde dendritic transport of neurotransmitter receptor complex (GO:0098971)         | 23.75 | 4.12E-02 |
| negative regulation of steroid hormone biosynthetic process (GO:0090032)                  | 23.75 | 4.12E-02 |
| positive regulation of the force of heart contraction (GO:0098735)                        | 23.75 | 4.12E-02 |
| neural crest cell migration involved in autonomic nervous system development (GO:1901166) | 23.75 | 4.12E-02 |
| primary amino compound biosynthetic process (GO:1901162)                                  | 23.75 | 4.12E-02 |
| glucose import across plasma membrane (GO:0098708)                                        | 23.75 | 4.12E-02 |
| negative regulation of lipoprotein metabolic process (GO:0050748)                         | 23.75 | 4.12E-02 |
| ascending aorta development (GO:0035905)                                                  | 23.75 | 4.12E-02 |
| thymocyte apoptotic process (GO:0070242)                                                  | 23.75 | 4.12E-02 |
| amacrine cell differentiation (GO:0035881)                                                | 23.75 | 4.12E-02 |
| putrescine biosynthetic process (GO:0009446)                                              | 23.75 | 4.12E-02 |
| long-chain fatty acid catabolic process (GO:0042758)                                      | 23.75 | 4.12E-02 |
| L-arginine import across plasma membrane (GO:0097638)                                     | 23.75 | 4.12E-02 |
| oxaloacetate transport (GO:0015729)                                                       | 23.75 | 4.12E-02 |
| trigeminal ganglion development (GO:0061551)                                              | 23.75 | 4.12E-02 |
| neuron-glia cell signaling (GO:0150099)                                                   | 23.75 | 4.12E-02 |
| endocardial cell differentiation (GO:0060956)                                             | 23.75 | 4.12E-02 |
| cardiac endothelial cell differentiation (GO:0003348)                                     | 23.75 | 4.12E-02 |
| ductus arteriosus closure (GO:0097070)                                                    | 23.75 | 4.12E-02 |
| hypothalamus cell migration (GO:0021855)                                                  | 23.75 | 4.12E-02 |
| pathway-restricted SMAD protein phosphorylation (GO:0060389)                              | 21.59 | 4.01E-03 |
| radial glial cell differentiation (GO:0060019)                                            | 21.59 | 4.01E-03 |
| forebrain dorsal/ventral pattern formation (GO:0021798)                                   | 19.79 | 4.93E-02 |
| branchiomotor neuron axon guidance (GO:0021785)                                           | 19.79 | 4.93E-02 |

|                                                                                             |       |          |
|---------------------------------------------------------------------------------------------|-------|----------|
| positive regulation of T-helper 1 cell differentiation (GO:0045627)                         | 19.79 | 4.93E-02 |
| positive regulation of cell-cell adhesion mediated by integrin (GO:0033634)                 | 19.79 | 4.93E-02 |
| optic nerve morphogenesis (GO:0021631)                                                      | 19.79 | 4.93E-02 |
| vesicle uncoating (GO:0072319)                                                              | 19.79 | 4.93E-02 |
| regulation of MHC class I biosynthetic process (GO:0045343)                                 | 19.79 | 4.93E-02 |
| positive regulation of epithelial cell proliferation involved in wound healing (GO:0060054) | 19.79 | 4.93E-02 |
| proline biosynthetic process (GO:0006561)                                                   | 19.79 | 4.93E-02 |
| semaphorin-plexin signaling pathway involved in axon guidance (GO:1902287)                  | 19.79 | 4.75E-03 |
| negative regulation of T cell migration (GO:2000405)                                        | 19.79 | 4.93E-02 |
| positive regulation of cardioblast differentiation (GO:0051891)                             | 19.79 | 4.93E-02 |
| peripheral nervous system axon regeneration (GO:0014012)                                    | 19.79 | 4.93E-02 |
| cellular response to interleukin-15 (GO:0071350)                                            | 19.79 | 4.93E-02 |
| hexose import across plasma membrane (GO:0140271)                                           | 19.79 | 4.93E-02 |
| L-lysine transport (GO:1902022)                                                             | 19.79 | 4.93E-02 |
| regulation of macrophage colony-stimulating factor production (GO:1901256)                  | 19.79 | 4.93E-02 |
| positive regulation of vascular endothelial growth factor signaling pathway (GO:1900748)    | 19.79 | 4.93E-02 |
| response to sucrose (GO:0009744)                                                            | 19.79 | 4.93E-02 |
| carbohydrate import across plasma membrane (GO:0098704)                                     | 19.79 | 4.93E-02 |
| negative regulation of insulin-like growth factor receptor signaling pathway (GO:0043569)   | 19.79 | 4.93E-02 |
| B cell chemotaxis (GO:0035754)                                                              | 19.79 | 4.93E-02 |
| interleukin-15-mediated signaling pathway (GO:0035723)                                      | 19.79 | 4.93E-02 |
| histone dephosphorylation (GO:0016576)                                                      | 19.79 | 4.93E-02 |
| osteoclast development (GO:0036035)                                                         | 19.79 | 4.93E-02 |
| negative regulation of guanyl-nucleotide exchange factor activity (GO:1905098)              | 19.79 | 4.93E-02 |
| L-proline biosynthetic process (GO:0055129)                                                 | 19.79 | 4.93E-02 |
| gamma-delta T cell differentiation (GO:0042492)                                             | 19.79 | 4.93E-02 |
| cranial ganglion development (GO:0061550)                                                   | 19.79 | 4.93E-02 |
| hindgut development (GO:0061525)                                                            | 19.79 | 4.93E-02 |
| negative regulation of plasminogen activation (GO:0010757)                                  | 19.79 | 4.93E-02 |
| T follicular helper cell differentiation (GO:0061470)                                       | 19.79 | 4.93E-02 |
| BMP signaling pathway involved in heart development (GO:0061312)                            | 19.79 | 4.93E-02 |
| smoothened signaling pathway involved in dorsal/ventral neural tube patterning (GO:0060831) | 19.79 | 4.93E-02 |
| L-lysine transmembrane transport (GO:1903401)                                               | 19.79 | 4.93E-02 |
| hypothalamus gonadotrophin-releasing hormone neuron development (GO:0021888)                | 19.79 | 4.93E-02 |
| hypothalamus gonadotrophin-releasing hormone neuron differentiation (GO:0021886)            | 19.79 | 4.93E-02 |
| L-ornithine transmembrane transport (GO:1903352)                                            | 19.79 | 4.93E-02 |
| positive regulation of bicellular tight junction assembly (GO:1903348)                      | 19.79 | 4.93E-02 |
| mammary gland formation (GO:0060592)                                                        | 19.79 | 4.93E-02 |
| response to disaccharide (GO:0034285)                                                       | 19.79 | 4.93E-02 |
| semaphorin-plexin signaling pathway involved in neuron projection guidance (GO:1902285)     | 18.27 | 5.54E-03 |



|                                                                                           |       |          |
|-------------------------------------------------------------------------------------------|-------|----------|
| negative regulation of lymphocyte migration (GO:2000402)                                  | 18.27 | 5.54E-03 |
| regulation of phospholipase A2 activity (GO:0032429)                                      | 18.27 | 5.54E-03 |
| negative regulation of mononuclear cell migration (GO:0071676)                            | 17.81 | 6.90E-04 |
| embryonic digestive tract morphogenesis (GO:0048557)                                      | 16.96 | 6.39E-03 |
| type B pancreatic cell development (GO:0003323)                                           | 16.96 | 6.39E-03 |
| negative regulation of type 2 immune response (GO:0002829)                                | 16.96 | 6.39E-03 |
| branching involved in salivary gland morphogenesis (GO:0060445)                           | 15.83 | 7.30E-03 |
| atrial septum morphogenesis (GO:0060413)                                                  | 15.83 | 7.30E-03 |
| phospholipid homeostasis (GO:0055091)                                                     | 15.83 | 7.30E-03 |
| negative regulation of lipase activity (GO:0060192)                                       | 14.84 | 8.25E-03 |
| pharyngeal system development (GO:0060037)                                                | 14.84 | 1.16E-03 |
| calcium ion import across plasma membrane (GO:0098703)                                    | 13.97 | 9.27E-03 |
| salivary gland morphogenesis (GO:0007435)                                                 | 13.7  | 1.46E-03 |
| calcium ion import into cytosol (GO:1902656)                                              | 13.19 | 1.03E-02 |
| salivary gland development (GO:0007431)                                                   | 12.72 | 1.80E-03 |
| regulation of monocyte differentiation (GO:0045655)                                       | 12.5  | 1.15E-02 |
| positive regulation of cell adhesion mediated by integrin (GO:0033630)                    | 12.5  | 1.15E-02 |
| NLS-bearing protein import into nucleus (GO:0006607)                                      | 12.5  | 1.15E-02 |
| embryonic digestive tract development (GO:0048566)                                        | 12.28 | 1.99E-03 |
| glandular epithelial cell development (GO:0002068)                                        | 11.87 | 1.26E-02 |
| negative regulation of cytokine production involved in inflammatory response (GO:1900016) | 11.87 | 1.26E-02 |
| type B pancreatic cell differentiation (GO:0003309)                                       | 11.87 | 1.26E-02 |
| hyperosmotic response (GO:0006972)                                                        | 11.31 | 1.38E-02 |
| regulation of endothelial cell chemotaxis (GO:2001026)                                    | 11.31 | 1.38E-02 |
| enteroendocrine cell differentiation (GO:0035883)                                         | 11.31 | 1.38E-02 |
| positive regulation of pathway-restricted SMAD protein phosphorylation (GO:0010862)       | 11.05 | 5.19E-04 |
| innervation (GO:0060384)                                                                  | 10.8  | 1.51E-02 |
| regulation of insulin-like growth factor receptor signaling pathway (GO:0043567)          | 10.8  | 1.51E-02 |
| negative regulation of steroid biosynthetic process (GO:0010894)                          | 10.8  | 1.51E-02 |
| endocardial cushion morphogenesis (GO:0003203)                                            | 10.48 | 3.11E-03 |
| response to muscle stretch (GO:0035994)                                                   | 10.33 | 1.64E-02 |
| atrial septum development (GO:0003283)                                                    | 10.33 | 1.64E-02 |
| gamma-aminobutyric acid signaling pathway (GO:0007214)                                    | 9.9   | 1.78E-02 |
| positive regulation of T cell migration (GO:2000406)                                      | 9.9   | 1.78E-02 |
| regulation of T cell migration (GO:2000404)                                               | 9.9   | 3.65E-03 |
| positive regulation of antigen receptor-mediated signaling pathway (GO:0050857)           | 9.9   | 1.78E-02 |
| negative regulation of steroid metabolic process (GO:0045939)                             | 9.9   | 1.78E-02 |
| atrioventricular valve morphogenesis (GO:0003181)                                         | 9.9   | 1.78E-02 |
| negative regulation of alpha-beta T cell differentiation (GO:0046639)                     | 9.5   | 1.92E-02 |
| semaphorin-plexin signaling pathway (GO:0071526)                                          | 9.38  | 4.24E-03 |
| exocrine system development (GO:0035272)                                                  | 9.38  | 4.24E-03 |
| regulation of hair cycle (GO:0042634)                                                     | 9.13  | 2.06E-02 |
| establishment of skin barrier (GO:0061436)                                                | 9.13  | 2.06E-02 |
| macrophage differentiation (GO:0030225)                                                   | 9.13  | 2.06E-02 |
| atrioventricular valve development (GO:0003171)                                           | 9.13  | 2.06E-02 |
| negative regulation of leukocyte migration (GO:0002686)                                   | 9.13  | 4.55E-03 |

|                                                                              |      |          |
|------------------------------------------------------------------------------|------|----------|
| regulation of lymphocyte migration (GO:2000401)                              | 8.96 | 1.12E-03 |
| lymphocyte chemotaxis (GO:0048247)                                           | 8.91 | 4.88E-03 |
| cranial nerve morphogenesis (GO:0021602)                                     | 8.8  | 2.21E-02 |
| branching involved in blood vessel morphogenesis (GO:0001569)                | 8.8  | 2.21E-02 |
| regulation of pathway-restricted SMAD protein phosphorylation (GO:0060393)   | 8.64 | 1.29E-03 |
| regulation of water loss via skin (GO:0033561)                               | 8.48 | 2.37E-02 |
| heart trabecula morphogenesis (GO:0061384)                                   | 8.48 | 2.37E-02 |
| cardiac atrium morphogenesis (GO:0003209)                                    | 8.48 | 2.37E-02 |
| glandular epithelial cell differentiation (GO:0002067)                       | 8.28 | 5.95E-03 |
| endocardial cushion development (GO:0003197)                                 | 8.28 | 5.95E-03 |
| negative regulation of protein processing (GO:0010955)                       | 8.19 | 2.53E-02 |
| membrane depolarization during action potential (GO:0086010)                 | 8.19 | 2.53E-02 |
| motor neuron axon guidance (GO:0008045)                                      | 8.19 | 2.53E-02 |
| negative regulation of protein maturation (GO:1903318)                       | 8.19 | 2.53E-02 |
| chemokine-mediated signaling pathway (GO:0070098)                            | 8.13 | 4.18E-04 |
| negative regulation of T cell differentiation (GO:0045581)                   | 7.92 | 6.74E-03 |
| positive regulation of lymphocyte migration (GO:2000403)                     | 7.92 | 2.69E-02 |
| regulation of type 2 immune response (GO:0002828)                            | 7.92 | 2.69E-02 |
| protein localization to synapse (GO:0035418)                                 | 7.74 | 7.16E-03 |
| positive regulation of calcium-mediated signaling (GO:0050850)               | 7.66 | 2.86E-02 |
| negative regulation of smoothened signaling pathway (GO:0045879)             | 7.66 | 2.86E-02 |
| positive regulation of ossification (GO:0045778)                             | 7.58 | 7.59E-03 |
| mesenchyme morphogenesis (GO:0072132)                                        | 7.58 | 7.59E-03 |
| negative regulation of epithelial to mesenchymal transition (GO:0010719)     | 7.42 | 3.03E-02 |
| cellular response to chemokine (GO:1990869)                                  | 7.24 | 7.03E-04 |
| response to chemokine (GO:1990868)                                           | 7.24 | 7.03E-04 |
| cellular defense response (GO:0006968)                                       | 7.12 | 8.97E-03 |
| columnar/cuboidal epithelial cell development (GO:0002066)                   | 6.99 | 3.38E-02 |
| protein depolymerization (GO:0051261)                                        | 6.99 | 3.38E-02 |
| smooth muscle cell differentiation (GO:0051145)                              | 6.99 | 3.38E-02 |
| neutrophil chemotaxis (GO:0030593)                                           | 6.99 | 2.76E-03 |
| cellular biogenic amine biosynthetic process (GO:0042401)                    | 6.99 | 3.38E-02 |
| liver regeneration (GO:0097421)                                              | 6.99 | 3.38E-02 |
| artery development (GO:0060840)                                              | 6.99 | 8.25E-04 |
| negative regulation of lymphocyte differentiation (GO:0045620)               | 6.85 | 9.97E-03 |
| amine biosynthetic process (GO:0009309)                                      | 6.79 | 3.56E-02 |
| cardiac atrium development (GO:0003230)                                      | 6.79 | 3.56E-02 |
| regulation of mononuclear cell migration (GO:0071675)                        | 6.79 | 2.91E-04 |
| ventricular septum morphogenesis (GO:0060412)                                | 6.6  | 3.75E-02 |
| monocyte chemotaxis (GO:0002548)                                             | 6.6  | 3.75E-02 |
| detection of mechanical stimulus involved in sensory perception (GO:0050974) | 6.6  | 3.75E-02 |
| endocrine pancreas development (GO:0031018)                                  | 6.6  | 3.75E-02 |
| detection of mechanical stimulus (GO:0050982)                                | 6.6  | 1.10E-02 |
| positive regulation of tyrosine phosphorylation of STAT protein (GO:0042531) | 6.6  | 1.10E-02 |
| granulocyte chemotaxis (GO:0071621)                                          | 6.51 | 3.55E-03 |
| SMAD protein signal transduction (GO:0060395)                                | 6.48 | 1.16E-02 |

|                                                                                                              |      |          |
|--------------------------------------------------------------------------------------------------------------|------|----------|
| antimicrobial humoral immune response mediated by antimicrobial peptide (GO:0061844)                         | 6.42 | 3.73E-03 |
| positive regulation of bone mineralization (GO:0030501)                                                      | 6.42 | 3.94E-02 |
| columnar/cuboidal epithelial cell differentiation (GO:0002065)                                               | 6.33 | 3.91E-03 |
| neutrophil migration (GO:1990266)                                                                            | 6.33 | 3.91E-03 |
| digestive tract morphogenesis (GO:0048546)                                                                   | 6.25 | 4.13E-02 |
| calcium-dependent cell-cell adhesion via plasma membrane cell adhesion molecules (GO:0016339)                | 6.25 | 4.13E-02 |
| endothelial cell differentiation (GO:0045446)                                                                | 6.17 | 4.29E-03 |
| regulation of synaptic transmission, glutamatergic (GO:0051966)                                              | 6.14 | 1.33E-02 |
| positive regulation of glial cell differentiation (GO:0045687)                                               | 6.09 | 4.33E-02 |
| receptor signaling pathway via JAK-STAT (GO:0007259)                                                         | 6.09 | 4.33E-02 |
| trabecula morphogenesis (GO:0061383)                                                                         | 6.09 | 4.33E-02 |
| receptor localization to synapse (GO:0097120)                                                                | 6.09 | 4.33E-02 |
| positive regulation of mononuclear cell migration (GO:0071677)                                               | 6.04 | 1.40E-02 |
| receptor signaling pathway via STAT (GO:0097696)                                                             | 5.94 | 4.53E-02 |
| T cell selection (GO:0045058)                                                                                | 5.79 | 4.73E-02 |
| granulocyte migration (GO:0097530)                                                                           | 5.79 | 5.34E-03 |
| negative regulation of alpha-beta T cell activation (GO:0046636)                                             | 5.79 | 4.73E-02 |
| glial cell migration (GO:0008347)                                                                            | 5.79 | 4.73E-02 |
| killing of cells of other organism (GO:0031640)                                                              | 5.75 | 1.59E-02 |
| positive regulation of transmembrane receptor protein serine/threonine kinase signaling pathway (GO:0090100) | 5.71 | 1.99E-03 |
| pancreas development (GO:0031016)                                                                            | 5.65 | 1.66E-02 |
| cardiac septum morphogenesis (GO:0060411)                                                                    | 5.57 | 1.73E-02 |
| lymphocyte migration (GO:0072676)                                                                            | 5.57 | 1.73E-02 |
| regulation of phospholipase activity (GO:0010517)                                                            | 5.4  | 1.87E-02 |
| endothelial cell migration (GO:0043542)                                                                      | 5.32 | 1.95E-02 |
| regulation of tyrosine phosphorylation of STAT protein (GO:0042509)                                          | 5.32 | 1.95E-02 |
| endothelium development (GO:0003158)                                                                         | 5.28 | 7.36E-03 |
| cellular response to interleukin-1 (GO:0071347)                                                              | 5.22 | 7.65E-03 |
| cell killing (GO:0001906)                                                                                    | 5.16 | 7.94E-03 |
| mononuclear cell migration (GO:0071674)                                                                      | 5.11 | 8.23E-03 |
| response to osmotic stress (GO:0006970)                                                                      | 5.09 | 2.18E-02 |
| gland morphogenesis (GO:0022612)                                                                             | 5.05 | 8.54E-03 |
| BMP signaling pathway (GO:0030509)                                                                           | 5.02 | 2.26E-02 |
| nerve development (GO:0021675)                                                                               | 4.95 | 2.35E-02 |
| protein localization to cell junction (GO:1902414)                                                           | 4.95 | 2.35E-02 |
| peptidyl-tyrosine dephosphorylation (GO:0035335)                                                             | 4.9  | 9.50E-03 |
| neural crest cell development (GO:0014032)                                                                   | 4.81 | 2.52E-02 |
| phagocytosis, recognition (GO:0006910)                                                                       | 4.75 | 2.60E-02 |
| cardiac septum development (GO:0003279)                                                                      | 4.7  | 1.09E-02 |
| endosome organization (GO:0007032)                                                                           | 4.69 | 2.69E-02 |
| leukocyte chemotaxis (GO:0030595)                                                                            | 4.64 | 4.80E-03 |
| mesenchymal cell development (GO:0014031)                                                                    | 4.51 | 2.97E-02 |
| stem cell development (GO:0048864)                                                                           | 4.51 | 2.97E-02 |
| antimicrobial humoral response (GO:0019730)                                                                  | 4.44 | 1.32E-02 |
| myeloid leukocyte migration (GO:0097529)                                                                     | 4.4  | 1.36E-02 |
| neural crest cell differentiation (GO:0014033)                                                               | 4.29 | 3.36E-02 |
| complement activation, classical pathway (GO:0006958)                                                        | 4.24 | 3.47E-02 |

|                                                                                       |      |          |
|---------------------------------------------------------------------------------------|------|----------|
| cellular response to BMP stimulus (GO:0071773)                                        | 4.19 | 3.57E-02 |
| response to BMP (GO:0071772)                                                          | 4.19 | 3.57E-02 |
| transforming growth factor beta receptor signaling pathway (GO:0007179)               | 4.19 | 3.57E-02 |
| regulation of lipase activity (GO:0060191)                                            | 4.19 | 3.57E-02 |
| regulation of neural precursor cell proliferation (GO:2000177)                        | 4.19 | 3.57E-02 |
| ameboidal-type cell migration (GO:0001667)                                            | 4.17 | 3.46E-03 |
| positive regulation of T cell differentiation (GO:0045582)                            | 4.14 | 3.68E-02 |
| digestive tract development (GO:0048565)                                              | 4.13 | 1.67E-02 |
| synapse assembly (GO:0007416)                                                         | 4.09 | 3.78E-02 |
| response to interleukin-1 (GO:0070555)                                                | 4.09 | 1.72E-02 |
| regulation of epithelial to mesenchymal transition (GO:0010717)                       | 4.09 | 3.78E-02 |
| regulation of organ growth (GO:0046620)                                               | 4.09 | 3.78E-02 |
| epithelial cell migration (GO:0010631)                                                | 4.09 | 3.78E-02 |
| humoral immune response mediated by circulating immunoglobulin (GO:0002455)           | 4.05 | 3.89E-02 |
| stem cell differentiation (GO:0048863)                                                | 4.04 | 8.45E-03 |
| epithelium migration (GO:0090132)                                                     | 4    | 4.00E-02 |
| negative regulation of lipid metabolic process (GO:0045833)                           | 4    | 4.00E-02 |
| cell-cell adhesion via plasma-membrane adhesion molecules (GO:0098742)                | 3.99 | 9.97E-04 |
| morphogenesis of a branching epithelium (GO:0061138)                                  | 3.98 | 8.92E-03 |
| cell chemotaxis (GO:0060326)                                                          | 3.89 | 4.79E-03 |
| branching morphogenesis of an epithelial tube (GO:0048754)                            | 3.89 | 2.03E-02 |
| regulation of wound healing (GO:0061041)                                              | 3.89 | 2.03E-02 |
| negative regulation of extrinsic apoptotic signaling pathway (GO:2001237)             | 3.87 | 4.34E-02 |
| digestive system development (GO:0055123)                                             | 3.86 | 2.08E-02 |
| homophilic cell adhesion via plasma membrane adhesion molecules (GO:0007156)          | 3.81 | 1.07E-02 |
| negative regulation of leukocyte cell-cell adhesion (GO:1903038)                      | 3.8  | 2.19E-02 |
| morphogenesis of a branching structure (GO:0001763)                                   | 3.76 | 1.13E-02 |
| tissue migration (GO:0090130)                                                         | 3.75 | 4.70E-02 |
| negative regulation of leukocyte differentiation (GO:1902106)                         | 3.71 | 4.82E-02 |
| B cell receptor signaling pathway (GO:0050853)                                        | 3.67 | 4.94E-02 |
| negative regulation of hemopoiesis (GO:1903707)                                       | 3.67 | 4.94E-02 |
| regulation of leukocyte migration (GO:0002685)                                        | 3.67 | 6.31E-03 |
| MAPK cascade (GO:0000165)                                                             | 3.64 | 1.27E-02 |
| liver development (GO:0001889)                                                        | 3.63 | 2.54E-02 |
| positive regulation of chemotaxis (GO:0050921)                                        | 3.63 | 2.54E-02 |
| chemotaxis (GO:0006935)                                                               | 3.58 | 4.28E-05 |
| transmembrane receptor protein serine/threonine kinase signaling pathway (GO:0007178) | 3.58 | 1.37E-02 |
| immunoglobulin production (GO:0002377)                                                | 3.57 | 2.67E-02 |
| hepaticobiliary system development (GO:0061008)                                       | 3.57 | 2.67E-02 |
| taxis (GO:0042330)                                                                    | 3.56 | 4.58E-05 |
| production of molecular mediator of immune response (GO:0002440)                      | 3.52 | 2.80E-02 |
| cellular response to transforming growth factor beta stimulus (GO:0071560)            | 3.52 | 2.80E-02 |
| import across plasma membrane (GO:0098739)                                            | 3.49 | 2.86E-02 |
| positive regulation of peptidyl-tyrosine phosphorylation (GO:0050731)                 | 3.43 | 1.61E-02 |
| lipid homeostasis (GO:0055088)                                                        | 3.37 | 3.21E-02 |
| negative regulation of cell-cell adhesion (GO:0022408)                                | 3.35 | 1.75E-02 |

|                                                                                                                                        |      |          |
|----------------------------------------------------------------------------------------------------------------------------------------|------|----------|
| response to transforming growth factor beta (GO:0071559)                                                                               | 3.35 | 3.28E-02 |
| T cell differentiation (GO:0030217)                                                                                                    | 3.35 | 3.28E-02 |
| calcium-mediated signaling (GO:0019722)                                                                                                | 3.35 | 3.28E-02 |
| regulation of T cell differentiation (GO:0045580)                                                                                      | 3.32 | 3.35E-02 |
| defense response to bacterium (GO:0042742)                                                                                             | 3.29 | 5.90E-03 |
| cell recognition (GO:0008037)                                                                                                          | 3.28 | 1.91E-02 |
| positive regulation of epithelial cell migration (GO:0010634)                                                                          | 3.25 | 3.57E-02 |
| positive regulation of leukocyte differentiation (GO:1902107)                                                                          | 3.23 | 3.65E-02 |
| positive regulation of hemopoiesis (GO:1903708)                                                                                        | 3.23 | 3.65E-02 |
| humoral immune response (GO:0006959)                                                                                                   | 3.22 | 6.53E-03 |
| regulation of epithelial cell migration (GO:0010632)                                                                                   | 3.2  | 1.20E-02 |
| regulation of response to wounding (GO:1903034)                                                                                        | 3.15 | 3.96E-02 |
| mesenchymal cell differentiation (GO:0048762)                                                                                          | 3.15 | 3.96E-02 |
| epithelial cell development (GO:0002064)                                                                                               | 3.12 | 2.30E-02 |
| regulation of axonogenesis (GO:0050770)                                                                                                | 3.1  | 4.12E-02 |
| cardiac chamber development (GO:0003205)                                                                                               | 3.1  | 4.12E-02 |
| negative regulation of cell activation (GO:0050866)                                                                                    | 3.06 | 2.48E-02 |
| negative regulation of cell adhesion (GO:0007162)                                                                                      | 3.06 | 8.59E-03 |
| adaptive immune response based on somatic recombination of immune receptors built from immunoglobulin superfamily domains (GO:0002460) | 3.04 | 2.53E-02 |
| negative regulation of Wnt signaling pathway (GO:0030178)                                                                              | 3.01 | 4.54E-02 |
| telencephalon development (GO:0021537)                                                                                                 | 2.98 | 1.63E-02 |
| sodium ion transport (GO:0006814)                                                                                                      | 2.97 | 4.72E-02 |
| muscle cell differentiation (GO:0042692)                                                                                               | 2.94 | 1.72E-02 |
| leukocyte migration (GO:0050900)                                                                                                       | 2.94 | 2.88E-02 |
| cardiac muscle tissue development (GO:0048738)                                                                                         | 2.93 | 4.90E-02 |
| cytokine-mediated signaling pathway (GO:0019221)                                                                                       | 2.91 | 6.69E-03 |
| mesenchyme development (GO:0060485)                                                                                                    | 2.91 | 2.99E-02 |
| epithelial tube morphogenesis (GO:0060562)                                                                                             | 2.91 | 1.11E-02 |
| regulation of chemotaxis (GO:0050920)                                                                                                  | 2.9  | 3.04E-02 |
| positive regulation of cell migration (GO:0030335)                                                                                     | 2.87 | 1.09E-03 |
| adaptive immune response (GO:0002250)                                                                                                  | 2.81 | 2.06E-03 |
| axon guidance (GO:0007411)                                                                                                             | 2.79 | 3.50E-02 |
| neuron projection guidance (GO:0097485)                                                                                                | 2.77 | 3.56E-02 |
| kidney development (GO:0001822)                                                                                                        | 2.75 | 2.31E-02 |
| positive regulation of neurogenesis (GO:0050769)                                                                                       | 2.75 | 3.68E-02 |
| positive regulation of cell motility (GO:2000147)                                                                                      | 2.74 | 1.60E-03 |
| positive regulation of cytosolic calcium ion concentration (GO:0007204)                                                                | 2.71 | 2.46E-02 |
| regulation of developmental growth (GO:0048638)                                                                                        | 2.71 | 1.58E-02 |
| positive regulation of MAPK cascade (GO:0043410)                                                                                       | 2.71 | 4.25E-03 |
| regulation of leukocyte differentiation (GO:1902105)                                                                                   | 2.7  | 2.50E-02 |
| positive regulation of cellular component movement (GO:0051272)                                                                        | 2.67 | 1.96E-03 |
| renal system development (GO:0072001)                                                                                                  | 2.67 | 2.62E-02 |
| positive regulation of locomotion (GO:0040017)                                                                                         | 2.67 | 1.99E-03 |
| striated muscle tissue development (GO:0014706)                                                                                        | 2.63 | 2.79E-02 |
| regulation of transmembrane receptor protein serine/threonine kinase signaling pathway (GO:0090092)                                    | 2.6  | 4.46E-02 |
| morphogenesis of an epithelium (GO:0002009)                                                                                            | 2.59 | 8.65E-03 |
| mononuclear cell differentiation (GO:1903131)                                                                                          | 2.53 | 3.29E-02 |
| enzyme linked receptor protein signaling pathway (GO:0007167)                                                                          | 2.51 | 3.23E-03 |

|                                                                               |      |          |
|-------------------------------------------------------------------------------|------|----------|
| positive regulation of lymphocyte activation (GO:0051251)                     | 2.51 | 2.27E-02 |
| muscle tissue development (GO:0060537)                                        | 2.5  | 3.44E-02 |
| regulation of hemopoiesis (GO:1903706)                                        | 2.47 | 2.47E-02 |
| vasculature development (GO:0001944)                                          | 2.45 | 8.21E-03 |
| cell-cell adhesion (GO:0098609)                                               | 2.44 | 8.44E-03 |
| gland development (GO:0048732)                                                | 2.44 | 1.80E-02 |
| cell migration (GO:0016477)                                                   | 2.44 | 9.51E-04 |
| negative regulation of immune system process (GO:0002683)                     | 2.41 | 1.90E-02 |
| urogenital system development (GO:0001655)                                    | 2.39 | 4.12E-02 |
| regulation of cytosolic calcium ion concentration (GO:0051480)                | 2.38 | 4.18E-02 |
| regulation of cell migration (GO:0030334)                                     | 2.38 | 8.45E-04 |
| wound healing (GO:0042060)                                                    | 2.34 | 4.52E-02 |
| tube morphogenesis (GO:0035239)                                               | 2.32 | 5.94E-03 |
| regulation of leukocyte cell-cell adhesion (GO:1903037)                       | 2.32 | 4.64E-02 |
| blood vessel development (GO:0001568)                                         | 2.31 | 1.68E-02 |
| tissue morphogenesis (GO:0048729)                                             | 2.31 | 1.21E-02 |
| circulatory system development (GO:0072359)                                   | 2.29 | 1.79E-03 |
| regulation of cell-cell adhesion (GO:0022407)                                 | 2.29 | 2.49E-02 |
| cellular divalent inorganic cation homeostasis (GO:0072503)                   | 2.26 | 2.65E-02 |
| regulation of cell motility (GO:2000145)                                      | 2.25 | 1.58E-03 |
| tube development (GO:0035295)                                                 | 2.23 | 3.23E-03 |
| positive regulation of leukocyte activation (GO:0002696)                      | 2.22 | 3.98E-02 |
| response to bacterium (GO:0009617)                                            | 2.21 | 1.18E-02 |
| regulation of cell adhesion (GO:0030155)                                      | 2.19 | 6.89E-03 |
| positive regulation of immune response (GO:0050778)                           | 2.19 | 2.33E-02 |
| positive regulation of cell activation (GO:0050867)                           | 2.16 | 4.53E-02 |
| blood vessel morphogenesis (GO:0048514)                                       | 2.16 | 4.53E-02 |
| regulation of locomotion (GO:0040012)                                         | 2.16 | 2.41E-03 |
| divalent inorganic cation homeostasis (GO:0072507)                            | 2.15 | 3.39E-02 |
| brain development (GO:0007420)                                                | 2.15 | 7.96E-03 |
| transmembrane receptor protein tyrosine kinase signaling pathway (GO:0007169) | 2.14 | 4.69E-02 |
| cellular calcium ion homeostasis (GO:0006874)                                 | 2.14 | 4.74E-02 |
| heart development (GO:0007507)                                                | 2.12 | 2.75E-02 |
| regulation of MAPK cascade (GO:0043408)                                       | 2.12 | 1.58E-02 |
| cellular metal ion homeostasis (GO:0006875)                                   | 2.11 | 2.84E-02 |
| muscle structure development (GO:0061061)                                     | 2.09 | 3.92E-02 |
| localization of cell (GO:0051674)                                             | 2.08 | 4.64E-03 |
| cell motility (GO:0048870)                                                    | 2.08 | 4.64E-03 |
| regulation of cellular component movement (GO:0051270)                        | 2.07 | 3.57E-03 |
| positive regulation of immune system process (GO:0002684)                     | 2.07 | 8.34E-03 |
| cell surface receptor signaling pathway (GO:0007166)                          | 2.06 | 5.81E-05 |
| response to growth factor (GO:0070848)                                        | 2.05 | 4.35E-02 |
| head development (GO:0060322)                                                 | 2.03 | 1.25E-02 |
| locomotion (GO:0040011)                                                       | 2.03 | 2.68E-03 |
| epithelium development (GO:0060429)                                           | 2.02 | 7.85E-03 |
| cell adhesion (GO:0007155)                                                    | 2    | 8.32E-03 |
| regulation of lymphocyte activation (GO:0051249)                              | 2    | 4.92E-02 |
| biological adhesion (GO:0022610)                                              | 1.99 | 8.73E-03 |
| regulation of cell activation (GO:0050865)                                    | 1.97 | 3.21E-02 |

|                                                                       |      |          |
|-----------------------------------------------------------------------|------|----------|
| regulation of leukocyte activation (GO:0002694)                       | 1.91 | 4.82E-02 |
| immune response (GO:0006955)                                          | 1.9  | 2.69E-03 |
| protein phosphorylation (GO:0006468)                                  | 1.85 | 4.62E-02 |
| chemical homeostasis (GO:0048878)                                     | 1.84 | 1.39E-02 |
| defense response to other organism (GO:0098542)                       | 1.83 | 2.62E-02 |
| positive regulation of intracellular signal transduction (GO:1902533) | 1.83 | 2.16E-02 |
| regulation of immune system process (GO:0002682)                      | 1.83 | 6.57E-03 |
| positive regulation of signal transduction (GO:0009967)               | 1.81 | 6.05E-03 |
| negative regulation of multicellular organismal process (GO:0051241)  | 1.8  | 2.46E-02 |
| positive regulation of response to stimulus (GO:0048584)              | 1.79 | 1.34E-03 |
| G protein-coupled receptor signaling pathway (GO:0007186)             | 1.77 | 3.95E-02 |
| positive regulation of cell communication (GO:0010647)                | 1.77 | 5.09E-03 |
| positive regulation of signaling (GO:0023056)                         | 1.77 | 5.38E-03 |
| regulation of multicellular organismal development (GO:2000026)       | 1.74 | 1.57E-02 |
| response to external stimulus (GO:0009605)                            | 1.72 | 1.80E-03 |
| response to other organism (GO:0051707)                               | 1.7  | 2.23E-02 |
| response to external biotic stimulus (GO:0043207)                     | 1.7  | 2.24E-02 |
| defense response (GO:0006952)                                         | 1.68 | 2.48E-02 |
| response to biotic stimulus (GO:0009607)                              | 1.65 | 2.98E-02 |
| tissue development (GO:0009888)                                       | 1.62 | 2.23E-02 |
| movement of cell or subcellular component (GO:0006928)                | 1.61 | 3.04E-02 |
| negative regulation of response to stimulus (GO:0048585)              | 1.61 | 2.38E-02 |
| homeostatic process (GO:0042592)                                      | 1.55 | 3.65E-02 |
| immune system process (GO:0002376)                                    | 1.52 | 1.98E-02 |
| regulation of intracellular signal transduction (GO:1902531)          | 1.51 | 4.30E-02 |
| phosphate-containing compound metabolic process (GO:0006796)          | 1.5  | 4.00E-02 |
| anatomical structure morphogenesis (GO:0009653)                       | 1.49 | 2.84E-02 |
| phosphorus metabolic process (GO:0006793)                             | 1.48 | 4.47E-02 |
| signal transduction (GO:0007165)                                      | 1.47 | 1.70E-03 |
| signaling (GO:0023052)                                                | 1.45 | 1.77E-03 |
| cell communication (GO:0007154)                                       | 1.44 | 1.69E-03 |
| animal organ development (GO:0048513)                                 | 1.41 | 2.13E-02 |
| regulation of signal transduction (GO:0009966)                        | 1.41 | 2.58E-02 |
| regulation of response to stimulus (GO:0048583)                       | 1.41 | 1.05E-02 |
| cellular developmental process (GO:0048869)                           | 1.4  | 1.63E-02 |
| cell differentiation (GO:0030154)                                     | 1.39 | 2.01E-02 |
| regulation of cell communication (GO:0010646)                         | 1.33 | 4.80E-02 |
| response to stress (GO:0006950)                                       | 1.32 | 4.94E-02 |
| localization (GO:0051179)                                             | 1.3  | 1.85E-02 |
| cellular response to stimulus (GO:0051716)                            | 1.27 | 1.57E-02 |
| response to stimulus (GO:0050896)                                     | 1.24 | 1.13E-02 |
| regulation of cellular metabolic process (GO:0031323)                 | 0.77 | 3.61E-02 |
| regulation of gene expression (GO:0010468)                            | 0.75 | 4.67E-02 |
| organonitrogen compound metabolic process (GO:1901564)                | 0.74 | 3.73E-02 |
| organic substance metabolic process (GO:0071704)                      | 0.72 | 3.18E-03 |
| primary metabolic process (GO:0044238)                                | 0.7  | 2.89E-03 |
| metabolic process (GO:0008152)                                        | 0.67 | 4.04E-04 |
| macromolecule metabolic process (GO:0043170)                          | 0.64 | 1.67E-03 |
| regulation of RNA metabolic process (GO:0051252)                      | 0.62 | 1.20E-02 |

|                                                                             |      |          |
|-----------------------------------------------------------------------------|------|----------|
| regulation of nucleobase-containing compound metabolic process (GO:0019219) | 0.62 | 8.32E-03 |
| cellular component assembly (GO:0022607)                                    | 0.61 | 4.38E-02 |
| cellular metabolic process (GO:0044237)                                     | 0.61 | 8.88E-05 |
| regulation of transcription, DNA-templated (GO:0006355)                     | 0.6  | 1.14E-02 |
| regulation of nucleic acid-templated transcription (GO:1903506)             | 0.6  | 1.14E-02 |
| regulation of RNA biosynthetic process (GO:2001141)                         | 0.6  | 1.11E-02 |
| nitrogen compound metabolic process (GO:0006807)                            | 0.59 | 1.62E-04 |
| regulation of cellular biosynthetic process (GO:0031326)                    | 0.59 | 4.22E-03 |
| cellular macromolecule metabolic process (GO:0044260)                       | 0.59 | 2.40E-03 |
| regulation of cellular macromolecule biosynthetic process (GO:2000112)      | 0.59 | 4.81E-03 |
| regulation of macromolecule biosynthetic process (GO:0010556)               | 0.58 | 4.26E-03 |
| regulation of biosynthetic process (GO:0009889)                             | 0.58 | 3.16E-03 |
| gene expression (GO:0010467)                                                | 0.57 | 3.98E-02 |
| cellular component biogenesis (GO:0044085)                                  | 0.55 | 1.59E-02 |
| catabolic process (GO:0009056)                                              | 0.53 | 3.00E-02 |
| protein-containing complex subunit organization (GO:0043933)                | 0.47 | 4.04E-02 |
| cellular catabolic process (GO:0044248)                                     | 0.46 | 2.20E-02 |
| cellular nitrogen compound metabolic process (GO:0034641)                   | 0.35 | 5.38E-05 |
| organic cyclic compound metabolic process (GO:1901360)                      | 0.34 | 8.33E-05 |
| heterocycle metabolic process (GO:0046483)                                  | 0.33 | 1.62E-04 |
| cellular aromatic compound metabolic process (GO:0006725)                   | 0.32 | 1.12E-04 |
| protein-containing complex assembly (GO:0065003)                            | 0.32 | 1.34E-02 |
| regulation of organelle organization (GO:0033043)                           | 0.31 | 1.21E-02 |
| regulation of cellular catabolic process (GO:0031329)                       | 0.3  | 3.66E-02 |
| cellular macromolecule catabolic process (GO:0044265)                       | 0.3  | 3.62E-02 |
| nucleobase-containing compound metabolic process (GO:0006139)               | 0.3  | 1.25E-04 |
| protein modification by small protein conjugation or removal (GO:0070647)   | 0.29 | 3.17E-02 |
| cellular macromolecule biosynthetic process (GO:0034645)                    | 0.28 | 4.27E-03 |
| macromolecule biosynthetic process (GO:0009059)                             | 0.27 | 3.65E-03 |
| nucleic acid metabolic process (GO:0090304)                                 | 0.19 | 4.15E-05 |
| RNA metabolic process (GO:0016070)                                          | 0.18 | 6.98E-04 |
| DNA metabolic process (GO:0006259)                                          | 0.17 | 1.96E-02 |
| organelle assembly (GO:0070925)                                             | 0.17 | 1.56E-02 |
| cellular protein-containing complex assembly (GO:0034622)                   | 0.16 | 1.33E-02 |

**Table S8: Mitochondrial proteins identified in the proteome**

| Gene Name | Fold Change |
|-----------|-------------|
| ATPIF1    | 4.018548    |
| MT-ATP8   | 2.197232    |
| ATP5J     | 1.10103     |
| ATP5C1    | 0.879601    |
| ATP5F1    | 0.915456    |
| ATP5L     | 0.854469    |
| ATP5I     | 0.900395    |
| ATP5D     | 0.871353    |
| ATP5J2    | 0.849222    |



|         |          |
|---------|----------|
| ATP5B   | 0.810028 |
| ATP5O   | 0.788785 |
| ATP5H   | 0.791517 |
| ATP5A1  | 0.851095 |
| MT-CO2  | 1.460963 |
| COX4I1  | 1.347129 |
| COX7C   | 1.75101  |
| COX6C   | 1.577966 |
| COX6B1  | 1.120388 |
| COX6A1  | 2.949049 |
| COX5A   | 0.916404 |
| COX5B   | 0.927444 |
| COX7A2  | 0.749172 |
| COX17   | 2.400447 |
| UQCRFS1 | 1.154948 |
| UQCR10  | 6.206716 |
| UQCRH   | 0.371352 |
| UQCRQ   | 2.187692 |
| UQCRB   | 1.219126 |
| UQCRC1  | 0.982761 |
| UQCRC2  | 0.976041 |
| CYCS    | 1.55574  |
| CYC1    | 1.125263 |
| SDHB    | 1.410843 |
| SDHA    | 1.104301 |
| NDUFA12 | 7.461814 |
| NDUFS6  | 4.618334 |
| NDUFA8  | 2.969559 |
| NDUFA2  | 3.035751 |
| NDUFA10 | 2.095882 |
| NDUFV1  | 1.912153 |
| NDUFB5  | 3.319082 |
| NDUFS5  | 3.243195 |
| NDUFA6  | 1.825396 |
| NDUFB8  | 5.01827  |
| NDUFB7  | 3.407429 |
| NDUFS7  | 1.646329 |
| NDUFB4  | 1.535386 |
| NDUFB3  | 1.529259 |
| NDUFA5  | 1.383444 |
| NDUFB10 | 1.4174   |
| NDUFS2  | 1.336946 |
| NDUFS1  | 1.174997 |
| NDUFA4  | 1.009238 |
| NDUFA9  | 0.925606 |
| NDUFB9  | 0.922808 |
| NDUFA13 | 0.924492 |
| NDUFB1  | 0.949932 |
| NDUFS3  | 0.669361 |
| NDUFV2  | 0.635888 |

|          |          |
|----------|----------|
| NDUFS8   | 0.501037 |
| ACLY     | 1.115909 |
| CS       | 0.927465 |
| ACOT7    | 1.0121   |
| ACO2     | 0.904633 |
| ACOT9    | 5.162997 |
| ACO1     | 4.33174  |
| IDH1     | 1.368543 |
| IDH3G    | 1.204262 |
| IDH3B    | 1.132544 |
| IDH3A    | 0.95235  |
| IDH2     | 0.893584 |
| SUCLG2   | 1.79844  |
| ALDH5A1  | 4.080714 |
| OXCT1    | 1.019517 |
| DLST     | 1.001079 |
| SUCLG1   | 1.285626 |
| MDH2     | 0.8063   |
| MDH1     | 1.103093 |
| ME2      | 0.993052 |
| GLUD1    | 1.218425 |
| PDHA1    | 1.380054 |
| FAHD1    | 1.245627 |
| DLAT     | 1.145313 |
| NNT      | 0.987826 |
| TOMM34   | 1.927577 |
| TOMM40   | 1.06683  |
| TOMM22   | 1.016178 |
| TOMM70   | 0.857848 |
| SAMM50   | 1.692605 |
| TIMM9    | 3.736157 |
| TIMM50   | 2.915511 |
| TIMM44   | 1.584089 |
| TIMM8B   | 0.216065 |
| CPT2     | 4.634012 |
| LETM1    | 2.028459 |
| SLC25A10 | 18.84246 |
| SLC25A1  | 3.362308 |
| SLC25A22 | 2.353646 |
| SLC25A13 | 2.197166 |
| SLC25A19 | 1.86867  |
| SLC25A12 | 1.469386 |
| SLC25A11 | 0.984992 |
| SLC25A3  | 0.923116 |
| SLC25A6  | 0.883156 |
| SLC25A5  | 0.915794 |
| SLC25A4  | 0.821475 |
| MRPL22   | 7.491335 |
| MRPL13   | 6.308792 |
| MRPL3    | 5.048019 |

|         |          |
|---------|----------|
| MRPL21  | 4.77883  |
| MRPL39  | 3.253796 |
| MRPL15  | 2.940529 |
| MRPL49  | 2.714974 |
| MRPL1   | 2.628413 |
| MRPL46  | 7.279318 |
| MRPL38  | 2.496483 |
| MRPL4   | 2.371223 |
| GLDC    | 7.6      |
| ACAD9   | 4.4      |
| ACADSB  | 3.9      |
| HMGCL   | 2.5      |
| ALDH1B1 | 2.4      |
| PPIF    | 2.3      |
| BDH1    | 2.3      |
| ABHD10  | 2.2      |
| HIBCH   | 2.1      |
| ECI1    | 2.1      |
| HINT2   | 2        |
| SUCLG2  | 1.8      |
| PPA2    | 1.8      |
| ACAA2   | 1.7      |
| GSR     | 1.7      |
| PDHA1   | 1.4      |
| HSPE1   | 0.9      |
| HSPD1   | 0.8      |
| MDH2    | 0.8      |
| HSPA9   | 0.8      |

**Table S9: Mitochondrial transcripts identified in the transcriptome**

| <b>Gene name</b> | <b>Fold Change</b> |
|------------------|--------------------|
| MT-TF            | 0.483319           |
| TOMM5            | 0.695822           |
| TIMM8B           | 0.729636           |
| SARS2            | 0.759087           |
| PDF              | 0.763535           |
| UQCRCQ           | 0.764501           |
| MRPL36           | 0.773116           |
| MRPL12           | 0.775793           |
| NDUFB7           | 0.779136           |
| FIS1             | 0.785406           |
| NDUFB2           | 0.786153           |
| MRPS18C          | 0.792595           |
| NDUFAF4          | 0.793272           |
| COX7C            | 0.795339           |
| MRPL1            | 0.799106           |
| ATP5ME           | 0.802727           |
| ATP5F1E          | 0.804208           |

|          |          |
|----------|----------|
| ALKBH7   | 0.805161 |
| MRPS28   | 0.807514 |
| COX5B    | 0.824178 |
| NDUFA4   | 0.824832 |
| ATP5MD   | 0.828656 |
| NDUFS4   | 0.829138 |
| COX7A2   | 0.838274 |
| NDUFB6   | 0.842167 |
| COX7B    | 0.843464 |
| NDUFS3   | 0.845565 |
| UQCRB    | 0.845616 |
| COX17    | 0.847244 |
| CYC1     | 0.847574 |
| SDHAF1   | 0.847876 |
| IDH3B    | 0.854883 |
| ATP5F1C  | 0.858171 |
| SLC25A11 | 0.862285 |
| SLC25A25 | 0.862698 |
| SDHAF4   | 0.863386 |
| ATP5IF1  | 0.865271 |
| ATP5PO   | 0.865923 |
| TIMM50   | 0.866348 |
| COX14    | 0.869231 |
| NDUFS7   | 0.870232 |
| TOMM7    | 0.872015 |
| NDUFA2   | 0.874745 |
| TIMM13   | 0.885936 |
| ATP5MC1  | 0.887943 |
| NDUFAF3  | 0.888937 |
| TOMM40   | 0.889823 |
| SLC25A6  | 0.890309 |
| NDUFV1   | 0.894996 |
| COX4I2   | 0.753953 |
| SLC25A41 | 0.756287 |
| SLC25A47 | 0.796938 |
| SLC25A10 | 0.84764  |
| SLC25A29 | 0.850192 |
| NDUFAF8  | 0.85633  |
| SDHAF3   | 0.861407 |
| NDUFV2   | 0.86268  |
| NDUFA1   | 0.863973 |
| COX6A1   | 0.864799 |
| UQCRHL   | 0.873007 |
| UQCRH    | 0.875275 |
| COX20    | 0.894291 |
| NDUFA11  | 0.895853 |
| SLC25A42 | 0.896236 |
| TIMM23B  | 0.897412 |
| UQCR11   | 0.899887 |
| ATP5F1D  | 0.901896 |

|          |          |
|----------|----------|
| ATP5MC2  | 0.907452 |
| COX6B1   | 0.920089 |
| NDUFB9   | 0.921986 |
| UQCRC1   | 0.928171 |
| DLST     | 0.943618 |
| NDUFS5   | 0.900311 |
| TIMM10   | 0.903133 |
| NDUFAF6  | 0.906191 |
| IDH2     | 0.907576 |
| NDUFB1   | 0.908102 |
| MDH1     | 0.908842 |
| MT-ND1   | 0.909513 |
| SLC25A17 | 0.910043 |
| ATP5MG   | 0.910078 |
| SLC25A32 | 0.91205  |
| COX6C    | 0.912577 |
| NDUFB3   | 0.913949 |
| NDUFA12  | 0.914104 |
| SDHAF2   | 0.914988 |
| ATP5S    | 0.917114 |
| MT-ND3   | 0.917555 |
| NDUFA6   | 0.921237 |
| SLC25A28 | 0.922533 |
| COX4I1   | 0.924381 |
| NDUFAF5  | 0.927269 |
| TIMM44   | 0.928058 |
| UQCR10   | 0.928763 |
| TIMM17B  | 0.929581 |
| ATP5PB   | 0.929752 |
| FH       | 0.930032 |
| NDUFAF2  | 0.932033 |
| ALKBH2   | 0.932771 |
| TIMM29   | 0.93287  |
| TOMM20   | 0.934633 |
| NDUFS8   | 0.934937 |
| ALKBH4   | 0.936381 |
| UQCRFS1  | 0.93658  |
| SLC25A39 | 0.937739 |
| NDUFAF7  | 0.938311 |
| ATP5PF   | 0.938513 |
| SLC25A35 | 0.938589 |
| COX5A    | 0.939493 |
| SLC25A26 | 0.940685 |
| SLC25A22 | 0.940793 |
| MDH2     | 0.940943 |
| SLC25A37 | 0.942612 |
| COX8A    | 0.94297  |
| SLC25A13 | 0.943048 |
| ATP5F1B  | 0.943429 |
| NDUFAB1  | 0.943441 |

|          |          |
|----------|----------|
| SDHB     | 0.944961 |
| TIMM23   | 0.946324 |
| ATP5MC3  | 0.947152 |
| NDUFS2   | 0.947567 |
| NDUFA5   | 0.948533 |
| MT-ND2   | 0.949129 |
| ATP5PD   | 0.949266 |
| COX19    | 0.950544 |
| IDH3G    | 0.950926 |
| SLC25A14 | 0.951504 |
| NDUFA8   | 0.952186 |
| TIMM22   | 0.952663 |
| SAMM50   | 0.953099 |
| MT-CYB   | 0.953403 |
| ATP5MF   | 0.95472  |
| SLC25A33 | 0.957183 |
| SLC25A45 | 0.958617 |
| NDUFB10  | 0.958693 |
| TIMM10B  | 0.959342 |
| SDHD     | 0.961767 |
| IDH3A    | 0.962965 |
| SLC25A1  | 0.963559 |
| TOMM22   | 0.965633 |
| TIMM8A   | 0.965978 |
| NDUFB8   | 0.96682  |
| UQCRC2   | 0.966893 |
| COX16    | 0.967562 |
| NDUFA13  | 0.967598 |
| SLC25A15 | 0.970712 |
| SLC25A19 | 0.974696 |
| SLC25A4  | 0.978543 |
| NDUFB11  | 0.980417 |
| TOMM34   | 0.980557 |
| COX18    | 0.982976 |
| SLC25A3  | 0.983026 |
| NDUFB4   | 0.984732 |
| NDUFA9   | 0.985233 |
| SLC25A12 | 0.988486 |
| NDUFS6   | 0.989726 |
| ALKBH6   | 0.990018 |
| SLC25A46 | 0.994967 |
| COX10    | 0.99525  |
| NDUFB5   | 0.995801 |
| TIMM17A  | 0.998263 |
| ALKBH3   | 0.999385 |
| CS       | 1.003083 |
| NDUFA3   | 1.006012 |
| SDHA     | 1.006262 |
| SLC25A20 | 1.008581 |
| SLC25A5  | 1.009059 |

|          |          |
|----------|----------|
| TIMMDC1  | 1.010464 |
| COX11    | 1.010713 |
| SLC25A16 | 1.013231 |
| NDUFA10  | 1.015352 |
| ACO1     | 1.016549 |
| NDUFC2   | 1.017404 |
| MT-ND4   | 1.017864 |
| ATP5F1A  | 1.023415 |
| NDUFS1   | 1.025747 |
| SDHC     | 1.029275 |
| COX6B2   | 1.031563 |
| SLC25A38 | 1.035799 |
| SLC25A36 | 1.036067 |
| CSKMT    | 1.042581 |
| MT-ATP6  | 1.045895 |
| NDUFA7   | 1.051238 |
| COX15    | 1.052307 |
| TIMM21   | 1.056458 |
| MDH1B    | 1.057118 |
| TIMM9    | 1.058648 |
| NDUFV3   | 1.06676  |
| MT-ND5   | 1.072956 |
| SLC25A51 | 1.074769 |
| TOMM70   | 1.075039 |
| NDUFAF1  | 1.078611 |
| SLC25A23 | 1.079845 |
| MT-ND4L  | 1.080345 |
| SLC25A44 | 1.090005 |
| MT-ND6   | 1.094263 |
| SLC25A40 | 1.097148 |
| NDUFC1   | 1.102    |
| SLC25A43 | 1.12793  |
| SLC25A53 | 1.133185 |
| SLC25A30 | 1.133792 |
| IDH1     | 1.144834 |
| MT-ATP8  | 1.171704 |
| COX7A1   | 1.209119 |
| SLC25A18 | 1.264148 |
| SUGCT    | 1.267714 |
| SLC25A34 | 1.283628 |
| SLC25A24 | 1.991716 |
